# Supplementary material for: Biosynthesis and Metabolism of Garlic Odor Compounds in Cultivated Chinese Chives (Allium tuberosum) and Wild Chinese Chives (Allium hookeri)
Source: Int J Mol Sci. 2022 Jun 24;23(13):7013. doi: 10.3390/ijms23137013 (PMC9266804; doi:10.3390/ijms23137013)
Supplement: Supplementary file 1 [file ijms-23-07013-s001.zip › suplementary tables.xlsx]

## Sheet: Table S1
Table S1. Metabolites detected by GC-MS and LC-MS
Metabolites	Method	mz	RT	KEGG	Classification	CC	WLH	Fold change1	p-value	Tuberosum-1	Tuberosum-2	Tuberosum-3	Tuberosum-4	Tuberosum-5	Tuberosum-6	Hookeri-1	Hookeri-2	Hookeri-3	Hookeri-4	Hookeri-5	Hookeri-6
L-Glutamine	LC	147.077	90.9788	C00064	amino acid	4.18121e+08	4.49339e+09	10.7466	1.44737e-13	3.39636e+08	3.19517e+08	4.02681e+08	5.6839e+08	4.31939e+08	4.46562e+08	4.53827e+09	4.58633e+09	4.25723e+09	4.66734e+09	4.31467e+09	4.5965e+09
3-(4-Hydroxyphenyl)-3-Oxopropyl-D-Glucopyranoside	LC	327.108	412.842		others	113451	679105	5.98588	4.71755e-13	102425	110790	112405	113750	129458	111878	671910	626755	686742	708502	693017	687702
L-Proline	LC	116.071	101.243	C00148	amino acid	1.12941e+08	1.30335e+09	11.5401	5.17791e-13	8.71969e+07	8.37468e+07	1.23405e+08	1.51373e+08	1.1212e+08	1.19808e+08	1.36066e+09	1.22729e+09	1.25638e+09	1.33924e+09	1.27605e+09	1.36049e+09
L-Serine	LC	106.05	89.5485	C00065	amino acid	2.08733e+07	1.33557e+08	6.39848	1.07728e-12	1.58234e+07	1.55808e+07	1.7989e+07	2.53479e+07	2.46768e+07	2.58217e+07	1.33641e+08	1.33348e+08	1.27172e+08	1.32182e+08	1.39752e+08	1.35248e+08
L-Threonine	LC	120.066	92.1463	C00188		2.50437e+07	2.32133e+08	9.26911	1.86719e-12	2.01139e+07	1.88515e+07	2.28972e+07	3.31637e+07	2.7198e+07	2.80377e+07	2.49218e+08	2.19184e+08	2.26802e+08	2.31982e+08	2.41071e+08	2.24539e+08
Ferulic Acid	LC	195.065	461.262	C01494	organic acid	1.01756e+07	8.75988e+07	8.60869	2.57243e-12	1.23142e+07	1.24723e+07	7.88087e+06	1.10781e+07	8.68644e+06	8.62184e+06	9.19502e+07	8.3132e+07	9.30353e+07	8.32151e+07	8.89309e+07	8.5329e+07
1-Aminocyclopropanecarboxylic Acid	LC	102.055	91.7154	C01234	amino acid	2.56341e+07	7.52129e+08	29.3409	6.6531e-12	1.93703e+07	1.82891e+07	2.58083e+07	4.26263e+07	2.29667e+07	2.4744e+07	8.07746e+08	7.38578e+08	7.9248e+08	7.80662e+08	6.99049e+08	6.94257e+08
Mannose	GC	103.049	1063.61	C00159	sugar	707.583	6637.58	9.38065	1.73513e-11	621.354	760.266	803.475	1004.91	540.417	515.072	7159.78	7148.53	6296.49	6371.84	6361.96	6486.91
Rhoifolin	LC	577.156	545.714	C12627	others	1.94838e+09	4.84667e+06	0.00248754	2.05104e-11	1.88604e+09	1.7732e+09	1.82327e+09	1.96883e+09	2.1417e+09	2.09723e+09	2.11774e+06	1.87513e+06	2.24237e+06	1.11075e+07	4.88435e+06	6.85293e+06
Fructose	GC	103.059	1057.52	C02336	sugar	1127.59	8625.11	7.64918	4.09213e-11	989.016	1209.49	1313.9	1588.57	847.389	817.148	9214.08	9399.04	8221.54	8265.73	8224.65	8425.6
L-Asparagine	LC	133.061	89.67	C00152		6.975e+06	1.44749e+08	20.7526	4.26677e-11	4.7067e+06	4.7019e+06	7.886e+06	1.16825e+07	6.043e+06	6.8299e+06	1.63788e+08	1.4049e+08	1.51749e+08	1.33807e+08	1.39443e+08	1.39219e+08
Methyldopa	LC	212.09	337.428	C07194	others	4.9034e+06	556195	0.113431	6.33419e-11	4.95275e+06	4.52787e+06	4.7854e+06	4.55508e+06	5.27698e+06	5.32229e+06	601015	530573	323309	759365	543466	579441
Citrulline	LC	176.103	94.1649	C00327	amino acid	2.24283e+06	6.14427e+07	27.3952	1.01791e-10	5.50365e+06	1.29197e+06	1.70818e+06	1.89255e+06	1.58046e+06	1.48014e+06	6.02376e+07	5.38319e+07	6.1982e+07	6.82487e+07	5.89109e+07	6.54451e+07
7-Deshydroxypyrogallin-4-Carboxylic Acid	LC	247.028	600.659		organic acid	4.22946e+06	49257.2	0.0116462	3.57778e-10	4.74596e+06	3.75102e+06	3.71317e+06	4.30079e+06	4.60429e+06	4.26152e+06	52686.7	30283.7	58436.4	62673	37672.3	53790.9
Proline	GC	142.088	637.75	C00148		36.4022	579.942	15.9315	3.6535e-10	25.6863	23.519	28.6527	53.9043	43.3248	43.3263	658.334	574.93	515.881	630.109	541.787	558.612
Glucose	GC	319.184	1074.2	C00031	sugar	1102.66	10020.4	9.08748	3.77612e-10	851.018	534.758	832.065	1988.67	1228.41	1181.01	10719.3	11189.1	9425.71	9355.13	9511.45	9921.44
Threonine	GC	218.1	712.523	C00188		12.2557	72.534	5.9184	1.36683e-09	12.5357	9.22721	12.1016	13.8476	12.8386	12.9834	78.9194	73.3011	65.2636	80.4902	73.4927	63.7367
Spermidine	LC	146.165	70.8538	C00315	amine	1.83557e+08	5.75383e+07	0.313462	1.88711e-09	1.60649e+08	1.81738e+08	1.9893e+08	1.7721e+08	1.91544e+08	1.91273e+08	5.46966e+07	5.04757e+07	5.64062e+07	6.94554e+07	6.10018e+07	5.31942e+07
3-Carboxypropyl Trimethylammonium	LC	146.118	101.475		others	5.40171e+06	5.89323e+07	10.9099	1.93906e-09	4.15153e+06	4.35749e+06	4.724e+06	8.27772e+06	5.66333e+06	5.2362e+06	7.01968e+07	5.96815e+07	6.10847e+07	5.40319e+07	5.42963e+07	5.43028e+07
Glyceric Acid	LC	105.018	84.5218	C00258	organic acid	5.78009e+08	2.06811e+09	3.578	2.76353e-09	6.67948e+08	7.1291e+08	7.44447e+08	4.82463e+08	4.39851e+08	4.20433e+08	1.97137e+09	1.96479e+09	1.97197e+09	2.2439e+09	2.107e+09	2.14965e+09
trans-Ferulic acid	GC	338.107	1170.48	C01494		4.05242	34.913	8.61534	2.89418e-09	3.42011	2.68025	2.4067	4.99658	5.27019	5.54071	37.5766	36.2939	29.6425	39.7238	33.1857	33.0555
2-Hydroxypropanoic Acid	LC	89.0232	94.6036	C01432	organic acid	4.70851e+07	3.75585e+08	7.97673	3.01584e-09	4.2897e+07	5.09089e+07	4.61053e+07	5.87748e+07	4.24486e+07	4.13759e+07	4.51164e+08	3.83082e+08	3.75337e+08	3.64211e+08	3.38685e+08	3.41031e+08
4-Hydroxyindole	LC	134.06	453.158	C02040	others	801210	6.88162e+06	8.58903	3.47704e-09	674490	645287	917184	1.07722e+06	702266	790813	6.33681e+06	6.0701e+06	6.69352e+06	7.94479e+06	7.70711e+06	6.53742e+06
Pyruvic acid	GC	174	413.752	C00022	organic acid	175.692	16.031	0.0912449	3.70979e-09	168.254	150.204	166.574	198.762	179.223	191.136	17.6694	32.8771	20.9553	5.52768	15.1961	3.96077
Serine	GC	204.1	690.381	C00065		179.805	760.685	4.2306	7.94351e-09	145.383	139.036	153.975	211.571	202.031	226.835	807.917	704.343	660.351	860.227	780.565	750.704
Beta-Alanine	LC	90.0556	90.5344	C00099	amino acid	8.57918e+07	3.17765e+08	3.70391	8.8896e-09	7.19987e+07	5.79758e+07	6.76402e+07	1.09985e+08	9.81162e+07	1.09035e+08	3.49085e+08	3.07027e+08	3.21347e+08	3.40545e+08	2.87129e+08	3.01459e+08
Pterostilbene	LC	257.113	795.115	C10287	others	9.39369e+06	2.2575e+06	0.240321	9.84992e-09	9.47511e+06	1.05615e+07	8.19641e+06	1.01485e+07	9.06219e+06	8.9184e+06	2.66879e+06	2.53411e+06	2.30945e+06	2.84424e+06	1.73706e+06	1.45135e+06
2,4-Dihydroxybutanoic acid	GC	103.003	730.495		organic acid	47.8962	20.3484	0.424844	1.22756e-08	49.3365	44.4335	48.8107	44.6557	48.2754	51.8652	20.67	21.3824	15.5146	24.2091	19.5946	20.7197
Apigenin	LC	271.059	545.392	C01477	others	9.00878e+07	439778	0.00488166	1.54584e-08	8.16204e+07	9.84704e+07	1.1393e+08	8.04029e+07	8.2361e+07	8.37419e+07	198422	178606	273131	964316	387530	636664
4-Hydroxy-Proline	GC	231.1	818.109	C01157		0.167313	1.34829	8.05852	1.67209e-08	0.158076	0.120249	0.141685	0.167084	0.211166	0.205615	1.33743	1.26426	1.15758	1.55726	1.20904	1.56418
Glutamine	GC	156.087	984.342	C00064		138.663	504.658	3.63946	3.12251e-08	105.827	103.682	122.012	192.563	146.081	161.811	499.509	509.838	431.67	581.554	496.834	508.541
Asparagine	GC	116.072	917.917	C00152		5.95778	75.9025	12.7401	3.29069e-08	4.82227	4.2893	5.14387	9.12447	6.02275	6.34403	94.7354	68.2273	73.8387	83.8466	68.6309	66.1362
Dioscin	LC	869.49	884.516	C08897	others	2.76512e+07	701850	0.0253823	4.32208e-08	2.62134e+07	3.48694e+07	2.40026e+07	2.51759e+07	3.13839e+07	2.42617e+07	171083	41659.9	207802	1.63105e+06	897615	1.26188e+06
N,N-Dimethylglycine	LC	104.071	94.9275	C01026	amino acid	1.20047e+07	1.66969e+08	13.9086	4.81819e-08	9.3552e+06	9.36438e+06	1.25558e+07	1.52086e+07	1.19537e+07	1.35907e+07	2.13652e+08	1.71265e+08	1.59167e+08	1.70672e+08	1.40004e+08	1.47054e+08
Homoserine	GC	218.092	759.702	C00263	amino acid	1.66433	5.70482	3.42769	5.35915e-08	1.34941	1.77966	1.90975	1.81707	1.73761	1.39249	6.14474	5.53062	4.83372	6.64571	5.83698	5.23713
L-Glutamic Acid	LC	148.061	93.2822	C00025	amino acid	6.27579e+08	1.47706e+09	2.35359	7.62093e-08	5.11941e+08	5.08989e+08	5.55386e+08	7.3321e+08	7.02569e+08	7.53381e+08	1.41415e+09	1.44264e+09	1.33895e+09	1.57896e+09	1.59096e+09	1.49672e+09
Shikimic acid	GC	204.096	1007.45	C00493	organic acid	13.3058	65.052	4.889	8.07725e-08	11.3945	10.9584	11.4157	14.8695	15.0219	16.1747	60.3477	61.7341	54.8291	81.114	65.4781	66.809
Pyroglutamic acid	GC	156.068	813.937	C01879	amino acid	171.617	707.703	4.12375	9.46658e-08	167.315	161.852	169.915	184.4	164.818	181.4	749.589	706.663	600.177	874.459	639.871	675.459
2,6-Dimethyl-4-Hydroxybenzaldehyde	LC	151.075	490.495		others	7.77027e+07	2.02892e+06	0.0261114	1.14502e-07	6.73747e+07	5.93102e+07	7.03191e+07	9.22339e+07	8.43209e+07	9.26572e+07	1.87034e+06	1.89452e+06	1.93132e+06	1.60457e+06	2.43443e+06	2.43836e+06
Quinine Ethyl Carbonate	LC	397.22	543.044		others	744674	2.86209e+06	3.84342	1.75388e-07	771112	632194	813045	739189	769329	743177	3.04007e+06	2.35197e+06	2.9408e+06	3.51681e+06	2.58286e+06	2.74005e+06
1,3-Di-tert-butylbenzene	GC	175.095	599.885		others	3.74491	5.03914	1.3456	1.92777e-07	3.84921	3.70621	3.78489	3.81627	3.70295	3.60993	4.92312	5.49167	4.82158	4.92522	5.00581	5.06745
Threonate	LC	135.029	84.0124	C01620	organic acid	3.9562e+08	8.03986e+08	2.03222	2.06343e-07	4.31515e+08	3.8513e+08	3.9195e+08	4.00521e+08	3.85298e+08	3.79303e+08	9.61426e+08	7.75511e+08	7.77236e+08	7.84073e+08	7.4932e+08	7.76349e+08
Ethanolamine	GC	174.094	611.759	C00189	amine	295.358	80.1099	0.27123	3.88858e-07	269.308	232.336	297.809	287.692	326.787	358.213	84.1729	71.7107	77.8455	100.501	72.1921	74.2368
Creatine	LC	129.975	528.701	C00300	organic acid	8.76347e+06	1.15989e+07	1.32355	4.15884e-07	9.2662e+06	9.55236e+06	8.85914e+06	8.19088e+06	8.33489e+06	8.37739e+06	1.16971e+07	1.16314e+07	1.17866e+07	1.11521e+07	1.16029e+07	1.1723e+07
Luteolin 7-O-Beta-D-Glucoside	LC	449.108	393.338	C03951	others	962938	1.07358e+08	111.49	4.33581e-07	242836	505746	1.65447e+06	580980	1.36355e+06	1.43004e+06	9.44235e+07	8.14651e+07	8.57049e+07	1.31424e+08	1.28297e+08	1.22834e+08
3-Hydroxydecanoic Acid	LC	187.133	601.885		fatty acid	3.8709e+07	1.07462e+07	0.277616	4.79645e-07	4.71643e+07	4.32493e+07	3.95287e+07	3.42165e+07	3.51439e+07	3.29508e+07	9.85975e+06	8.60387e+06	8.26805e+06	1.32157e+07	1.23633e+07	1.21666e+07
P-Coumaric Acid	LC	165.055	424.473	C00811	organic acid	1.93406e+07	2.17357e+06	0.112384	6.22801e-07	1.52063e+07	1.53634e+07	1.82334e+07	2.1223e+07	2.36982e+07	2.23192e+07	1.41409e+06	4.47533e+06	1.44078e+06	1.97557e+06	1.89834e+06	1.83733e+06
Ritalinic Acid	LC	220.133	438.684		organic acid	2.11071e+07	907950	0.0430163	6.99534e-07	1.76153e+07	2.10606e+07	1.40414e+07	2.55357e+07	2.48464e+07	2.35431e+07	1.48809e+06	797821	329290	1.0924e+06	1.08126e+06	658836
Trehalose	LC	343.13	482.478	C01083	sugar	1.66801e+07	2.02938e+06	0.121665	7.14812e-07	2.08556e+07	1.88277e+07	1.78568e+07	1.46838e+07	1.41483e+07	1.37081e+07	924545	807390	1.11269e+06	1.469e+06	4.37295e+06	3.48969e+06
Furfural	LC	97.029	100.979	C14279	others	2.22043e+07	4.40375e+07	1.98329	7.72729e-07	1.89069e+07	1.93434e+07	2.04257e+07	2.51789e+07	2.42237e+07	2.51472e+07	4.28626e+07	4.03986e+07	3.86492e+07	4.77425e+07	4.72446e+07	4.73274e+07
Glycolic acid	GC	176.996	437.819	C00160	organic acid	0.597148	1.91578	3.20821	9.54199e-07	0.451984	0.697983	0.580015	0.629107	0.632529	0.591268	2.01373	1.96301	1.46088	2.31011	1.70731	2.03961
Purpurogallin	LC	219.031	83.7291	C09964	others	6.98063e+07	1.81469e+08	2.59961	1.24228e-06	9.12443e+07	1.02021e+08	8.07095e+07	5.26069e+07	4.62596e+07	4.59967e+07	1.78241e+08	1.84771e+08	1.91227e+08	1.6333e+08	1.89602e+08	1.81644e+08
Galactaric acid	GC	333.119	1144.48	C00879	organic acid	11.7875	53.2351	4.51623	1.2615e-06	7.09776	8.06291	7.69088	14.6461	15.349	17.8784	63.449	61.4888	48.1159	49.2144	56.3539	40.7884
Tyramine	LC	138.092	263.946	C00483	amine	9.39565e+07	1.9909e+08	2.11896	1.5141e-06	8.54724e+07	8.37435e+07	1.06283e+08	9.68138e+07	9.6865e+07	9.45615e+07	1.99141e+08	2.37864e+08	1.87339e+08	2.16509e+08	1.77579e+08	1.7611e+08
2-Keto Valeric Acid	LC	115.039	614.151	C06255	organic acid	5.96435e+06	2.46291e+06	0.412938	1.82096e-06	5.22522e+06	5.16115e+06	6.07216e+06	6.17912e+06	6.28133e+06	6.86713e+06	2.35587e+06	2.3223e+06	2.27108e+06	3.60034e+06	2.21104e+06	2.01681e+06
3-(2-(Methylamino)Ethyl)-1H-Indol-5-Ol	LC	191.118	370.955	C06212	others	340942	9.80882e+06	28.7698	1.9351e-06	365992	195862	206725	504563	367319	405190	1.17296e+07	1.25614e+07	1.14698e+07	7.66717e+06	7.1638e+06	8.26122e+06
L-Histidine	LC	154.061	99.1526	C00135	amino acid	3.50775e+06	2.43311e+07	6.93638	2.4285e-06	3.13353e+06	2.7896e+06	3.50163e+06	3.63865e+06	4.02214e+06	3.96097e+06	3.22516e+07	2.51976e+07	2.68271e+07	2.49876e+07	1.80685e+07	1.86539e+07
2,4,6-Tri-tert.-butylbenzenethiol	GC	263.146	828.379		others	2.04558	2.78562	1.36178	3.26094e-06	2.08362	2.02856	2.08751	1.95922	2.02867	2.08588	2.70678	3.03612	2.4793	2.91475	2.79308	2.78368
(+)-Muscarine	LC	174.149	331.024	C07473	others	522646	5.40809e+06	10.3475	3.37809e-06	501520	521736	562519	458965	528082	563052	6.29623e+06	6.20762e+06	7.10678e+06	4.43741e+06	4.56725e+06	3.83328e+06
Succinic Anhydride	LC	99.0075	104.314	C19524	others	2.53321e+07	2.00361e+07	0.790939	3.83036e-06	2.49809e+07	2.4401e+07	2.5255e+07	2.51417e+07	2.59807e+07	2.6233e+07	1.84007e+07	1.91903e+07	1.92714e+07	2.16326e+07	2.10367e+07	2.06851e+07
S-methyl-Cysteine	GC	218.09	738.197		amino acid	7.5312	14.336	1.90355	3.94132e-06	8.47613	6.48205	7.65886	7.49415	7.3496	7.72642	14.7508	14.9031	13.509	17.0575	13.9374	11.8582
Luteolin	LC	287.055	393.22	C01514	others	2.23186e+06	1.14679e+07	5.13826	4.09154e-06	2.31025e+06	1.73927e+06	310506	3.06331e+06	2.94061e+06	3.02724e+06	1.0025e+07	8.92813e+06	9.38911e+06	1.39588e+07	1.36504e+07	1.28559e+07
Phosphoric acid	GC	299.097	619.137	C00009	phosphoric acid	1477.96	3704.13	2.50624	5.10734e-06	1317.1	1438.13	1408.76	1395.19	1558.2	1750.4	4346.49	4056.67	4218.41	3361.98	2800.86	3440.4
Glycine	GC	174.09	646.094	C00037	amino acid	48.672	401.331	8.24563	5.20952e-06	34.7281	29.115	38.3522	62.2786	64.2432	63.3147	376.19	332.165	273.55	550.323	454.464	421.295
Trp-Lys-OH	LC	455.189	457.748		others	1.38614e+07	710155	0.0512327	5.89207e-06	9.39783e+06	1.07944e+07	1.20371e+07	1.70022e+07	1.50665e+07	1.88701e+07	524594	510888	534584	1.06647e+06	848924	775469
L-Cys-Gly	LC	177.033	415.942	C01419	amino acid	1.27272e+06	181311	0.14246	6.1198e-06	1.30577e+06	1.2977e+06	1.10876e+06	1.33226e+06	1.26528e+06	1.32653e+06	49636.8	65375.4	49323	790848	76763.7	55920
3-Amino-2-Naphthoic Acid	LC	186.059	350.851		amino acid	1.72711e+06	301986	0.17485	7.07119e-06	2.30404e+06	1.53316e+06	1.85738e+06	1.96057e+06	1.53861e+06	1.16893e+06	519170	265041	245028	298180	249171	235327
Genistein	LC	269.045	707.643	C06563	others	7.76701e+08	1.8731e+07	0.0241161	9.46113e-06	1.04457e+09	8.93677e+08	3.83757e+08	6.83518e+08	8.60674e+08	7.94011e+08	1.73867e+07	1.36758e+07	2.16767e+07	3.37926e+07	1.0241e+07	1.56131e+07
N-Desmethyldiazepam (Nordazepam)	LC	271.06	710.159	C07486	others	3.81647e+08	6.97808e+06	0.0182841	9.85908e-06	5.11051e+08	4.31348e+08	1.75998e+08	3.60264e+08	4.00987e+08	4.10236e+08	6.05195e+06	5.41291e+06	8.65725e+06	1.16349e+07	3.89689e+06	6.21457e+06
L-Aspartic Acid	LC	134.045	90.5359	C00049	amino acid	5.94332e+07	1.04794e+08	1.76322	9.87224e-06	5.85085e+07	5.8405e+07	6.1109e+07	5.62164e+07	6.39566e+07	5.84037e+07	9.09649e+07	9.65994e+07	9.16097e+07	1.14223e+08	1.21959e+08	1.13408e+08
Benzyloxyphenylisoserine Ethylester	LC	312.13	96.7939		others	3.03346e+06	1.31517e+07	4.33556	1.03012e-05	3.16421e+06	4.28695e+06	3.21961e+06	3.17558e+06	2.01342e+06	2.34096e+06	1.55146e+07	1.48051e+07	1.6359e+07	1.28689e+07	1.02363e+07	9.12636e+06
Threonic acid	GC	292.1	845.708	C01620		111.827	413.419	3.69694	1.12278e-05	97.1437	97.8571	107	135.435	113.404	120.123	549.201	489.234	419.559	355.083	313.93	353.505
Hesperetin	LC	301.071	721.774	C01709	others	135733	1.99983e+06	14.7336	1.14071e-05	92103.9	66796.5	175932	167079	169906	142578	2.5323e+06	2.49266e+06	2.07129e+06	2.30027e+06	1.23513e+06	1.36732e+06
Adenosine	LC	266.089	351.458	C00212	others	1.191e+07	6.13132e+06	0.514806	1.20556e-05	1.25083e+07	1.01693e+07	1.1076e+07	1.22583e+07	1.23165e+07	1.31313e+07	7.34622e+06	6.22798e+06	6.68869e+06	7.63428e+06	4.18448e+06	4.70629e+06
12-Hydroxydodecanoic Acid	LC	215.165	667.149	C08317	fatty acid	1.79131e+06	770455	0.430107	1.2954e-05	1.4691e+06	1.52619e+06	2.2636e+06	1.89478e+06	1.90989e+06	1.6843e+06	694100	705312	699238	962959	862683	698440
Perphenazine	LC	404.153	366.704	C07427	others	3.68192e+06	805804	0.218854	1.33202e-05	3.1574e+06	2.5935e+06	2.93456e+06	4.31585e+06	4.4815e+06	4.60872e+06	780624	687748	690440	980097	784066	911851
Deethylatrazine	LC	188.071	409.6	C06559	others	2.91946e+07	7.41354e+07	2.53935	1.34385e-05	2.68694e+07	2.47568e+07	2.58002e+07	3.24217e+07	3.1974e+07	3.33457e+07	8.88654e+07	7.76914e+07	7.53823e+07	8.66844e+07	5.75956e+07	5.85929e+07
3-Hydroxy-Tetradecanoic Acid	LC	243.196	832.966		fatty acid	3.28812e+07	1.16037e+07	0.352897	1.3495e-05	4.01814e+07	4.04445e+07	3.46182e+07	2.67911e+07	2.92159e+07	2.6036e+07	1.14073e+07	1.05469e+07	9.7491e+06	1.23952e+07	1.30323e+07	1.24911e+07
Erythronic acid	GC	292.1	834.155		organic acid	72.8451	134.053	1.84025	1.37013e-05	69.5305	65.7112	71.6909	72.9658	75.5862	81.5859	129.351	134.426	105.152	161.98	133.586	139.825
Putrescine	LC	89.108	76.0811	C00134	amine	3.97993e+06	1.39417e+07	3.50301	1.81039e-05	1.85689e+06	2.32945e+06	4.18163e+06	4.86529e+06	4.99117e+06	5.65514e+06	1.10922e+07	1.04792e+07	1.49021e+07	1.74005e+07	1.64178e+07	1.33586e+07
5-S-methyl-5-thioadenosine	LC	298.097	396.312	C00170	others	2.09149e+07	9.98082e+06	0.477212	2.03677e-05	2.62862e+07	1.69655e+07	1.97584e+07	2.06347e+07	2.25091e+07	1.93353e+07	1.18672e+07	7.73973e+06	1.14624e+07	8.92742e+06	1.05703e+07	9.31795e+06
Pyridoxine	LC	170.081	160.824	C00314	polyol	8.32276e+07	1.9153e+06	0.0230128	2.17636e-05	1.03959e+08	1.03185e+08	3.17967e+07	9.21988e+07	8.18166e+07	8.64099e+07	2.74064e+06	1.52998e+06	1.23776e+06	1.83553e+06	796282	3.35163e+06
Baicalin	LC	447.093	564.299	C10025	others	9.43602e+08	2.46873e+06	0.00261629	2.2874e-05	7.22062e+08	6.11611e+08	6.52776e+08	1.18738e+09	1.25388e+09	1.23391e+09	356461	160553	477379	4.64088e+06	3.41195e+06	5.76518e+06
7-Epi Jasmonic Acid	LC	209.118	506.986	C16317	organic acid	831588	3.63695e+06	4.3735	2.44388e-05	719276	637723	830444	580066	494484	1.72753e+06	4.70277e+06	4.46471e+06	3.57682e+06	3.53411e+06	2.81413e+06	2.72914e+06
Genistein 7-O-Beta-D-Glucoside	LC	433.113	560.528	C09126	others	2.23773e+08	2.4759e+06	0.0110643	2.5209e-05	1.35663e+08	1.28412e+08	2.35109e+08	2.64118e+08	2.95435e+08	2.839e+08	1.44749e+06	1.50501e+06	2.41178e+06	3.56002e+06	2.99931e+06	2.93178e+06
Dicyclomine	LC	310.272	809.636	C06951	others	9.93664e+06	2.33262e+07	2.3475	2.60683e-05	1.0558e+07	1.13748e+07	1.07201e+07	8.15423e+06	8.28976e+06	1.0523e+07	2.86016e+07	2.50689e+07	2.39443e+07	1.80979e+07	1.82368e+07	2.6008e+07
Pipecolate	GC	156.087	693.273	C00408		5.32079	12.2193	2.29652	2.89736e-05	5.98951	6.77389	6.59383	3.94951	4.60741	4.01062	12.0834	11.3828	11.0528	16.1285	11.6973	10.9711
2-Linoleoyl Glycerol	LC	355.284	885.622		polyol	6.34932e+06	1.59521e+07	2.51241	3.04101e-05	5.20405e+06	6.40086e+06	6.6543e+06	6.17555e+06	5.46176e+06	8.1994e+06	1.28527e+07	1.49192e+07	1.81362e+07	2.11026e+07	1.36086e+07	1.50932e+07
p-Aminobenzoic Acid	LC	138.055	99.1495	C00568	organic acid	1.05704e+09	4.03463e+08	0.381693	3.18138e-05	8.225e+08	8.30048e+08	9.2169e+08	1.28944e+09	1.23233e+09	1.2462e+09	4.63869e+08	3.82564e+08	4.28539e+08	3.72634e+08	3.70757e+08	4.02413e+08
Adenine	LC	136.062	297.19	C00147	others	1.3045e+08	7.14977e+07	0.548084	3.28949e-05	1.27335e+08	1.10609e+08	1.28684e+08	1.28253e+08	1.3792e+08	1.49901e+08	8.00629e+07	8.50931e+07	7.79062e+07	8.23641e+07	4.81047e+07	5.54554e+07
4-Pyridoxic Acid	LC	182.045	356.205	C00847	organic acid	1.78504e+07	4.46165e+06	0.249946	3.44617e-05	1.39763e+07	1.288e+07	1.42623e+07	2.08527e+07	2.33478e+07	2.17836e+07	4.43838e+06	4.24945e+06	4.27784e+06	5.07246e+06	4.52281e+06	4.20894e+06
(6S)-Dehydrovomifoliol	LC	223.133	484.682	C02533	others	1.14174e+07	1.07545e+06	0.0941939	3.77029e-05	6.55634e+06	1.12753e+07	7.72471e+06	1.5636e+07	1.39643e+07	1.33477e+07	864374	784166	872374	1.53913e+06	1.19751e+06	1.19514e+06
Aesculin	LC	339.072	396.584	C09264	others	114669	766164	6.68151	4.23155e-05	188345	98611.3	130013	65957.8	107906	97182.4	645885	568855	504188	1.08678e+06	873086	918187
Vanillic Acid	LC	167.034	574.696	C06672	organic acid	3.81044e+06	932560	0.244738	4.33754e-05	3.75762e+06	3.83168e+06	1.91186e+06	4.0985e+06	4.49765e+06	4.76533e+06	993897	1.00158e+06	1.12584e+06	1.08061e+06	638908	754525
Malonic Acid	LC	103.002	79.1587	C00383	organic acid	1.27045e+07	3.07542e+07	2.42073	4.74754e-05	1.48807e+07	8.69891e+06	1.18487e+07	1.74069e+07	1.15011e+07	1.18909e+07	3.27731e+07	3.42493e+07	3.95889e+07	2.54567e+07	2.73109e+07	2.51466e+07
(R)-Noradrenaline	LC	168.066	303.141	C00547	others	9.57942e+06	244067	0.0254783	5.59146e-05	1.15694e+07	7.84597e+06	3.31229e+06	1.14276e+07	1.11633e+07	1.21579e+07	303903	251227	250074	270557	194507	194133
D-Glucarate	LC	209.03	77.6802	C00818	organic acid	3.39754e+07	1.32656e+08	3.90447	6.06263e-05	2.70913e+07	2.27047e+07	2.63724e+07	4.42498e+07	4.31793e+07	4.02552e+07	1.59159e+08	1.52414e+08	1.79732e+08	1.00755e+08	1.05586e+08	9.82906e+07
L-Tryptophan	LC	203.082	381.06	C00078	amino acid	2.81535e+06	7.33056e+06	2.60379	6.06447e-05	2.71958e+06	2.40451e+06	2.53113e+06	3.03796e+06	3.05656e+06	3.14234e+06	9.22337e+06	7.69059e+06	7.2923e+06	8.93157e+06	5.46315e+06	5.38238e+06
LysoPE(15:0/0:0)	LC	440.277	895.218		others	5.6093e+06	1.75003e+06	0.311986	6.65321e-05	4.56918e+06	4.39752e+06	4.99917e+06	5.68419e+06	6.1149e+06	7.89087e+06	2.06279e+06	2.4972e+06	2.23225e+06	1.47216e+06	711718	1.52403e+06
Phloretin	LC	273.077	700.402	C00774	others	103794	594153	5.72434	6.77929e-05	97392.3	88158.2	53063.2	127825	122330	133996	660341	827974	676471	614043	297582	488506
Threonic acid-1,4-lactone	GC	101	701.939		others	4.97868	2.69889	0.54209	6.82405e-05	5.30949	4.35771	3.91261	4.75396	5.47645	6.06184	2.66392	2.7502	2.85344	3.17559	2.13693	2.61325
Glycerol	GC	205.097	618.495	C00116	polyol	369.491	176.634	0.478048	7.55369e-05	318.818	284.425	316.813	423.207	421.098	452.581	178.958	169.831	178.476	210.364	148.964	173.213
9H-Xanthine	LC	153.041	175.032	C00385	others	1.05312e+09	4.81811e+06	0.0045751	8.08993e-05	7.25812e+08	5.60735e+08	7.91552e+08	1.36502e+09	1.43713e+09	1.43844e+09	1.43489e+06	1.30235e+06	4.80539e+06	9.52979e+06	5.23674e+06	6.59949e+06
Kynurenic Acid	LC	190.048	329.316	C01717	organic acid	6.6279e+06	1.38263e+06	0.208608	8.26976e-05	6.02907e+06	4.00611e+06	5.3688e+06	6.38252e+06	9.38541e+06	8.59547e+06	1.37216e+06	1.33741e+06	1.21833e+06	1.5576e+06	1.46125e+06	1.34903e+06
N-Palmitoyl Glycine	LC	312.254	889.085		amino acid	1.28496e+06	1.67491e+06	1.30348	8.96988e-05	1.34577e+06	1.155e+06	1.35491e+06	1.20812e+06	1.27517e+06	1.37076e+06	1.73884e+06	1.76168e+06	1.53151e+06	1.60298e+06	1.5715e+06	1.84298e+06
4-Nitrophenol	LC	138.019	629.12	C00870	others	1.14995e+07	4.87484e+06	0.423918	9.18664e-05	1.05082e+07	9.92801e+06	8.41245e+06	1.24834e+07	1.32431e+07	1.44216e+07	6.53231e+06	5.36428e+06	5.15248e+06	5.40588e+06	3.097e+06	3.69706e+06
3,5-cyclic AMP	LC	330.06	161.707	C00575	nucleotides	2.54139e+06	1.11148e+07	4.37353	0.000113607	1.60937e+06	1.31893e+06	1.99502e+06	2.57178e+06	3.57807e+06	4.17516e+06	9.50256e+06	1.18259e+07	1.20136e+07	1.66584e+07	7.20576e+06	9.48282e+06
L-Tyrosine	LC	182.081	233.374	C00082	amino acid	8.93442e+07	1.77941e+08	1.99164	0.000148197	8.26743e+07	7.69219e+07	7.95249e+07	1.0449e+08	9.39078e+07	9.85467e+07	2.25422e+08	1.88325e+08	1.80809e+08	1.98447e+08	1.34918e+08	1.39727e+08
Guanine	LC	152.057	307.162	C00242	others	9.44639e+07	4.72056e+07	0.499721	0.00016628	9.88502e+07	8.94362e+07	1.0813e+08	7.73978e+07	9.23456e+07	1.00623e+08	6.0103e+07	6.23736e+07	5.94923e+07	4.76264e+07	2.30638e+07	3.05746e+07
Rutin	LC	609.146	490.466	C05625	others	782801	5.30506e+07	67.7703	0.000170606	670602	824127	1.72509e+06	541053	479461	456471	7.24205e+07	6.79611e+07	5.26332e+07	7.25444e+07	2.27971e+07	2.99475e+07
D-Glucose 6-Phosphate	LC	259.022	78.5725	C00092	phosphoric acid	5.65219e+06	1.33883e+07	2.3687	0.000182994	3.28758e+06	3.97755e+06	5.63701e+06	6.66492e+06	6.84922e+06	7.49686e+06	1.23307e+07	1.46115e+07	1.72505e+07	8.88318e+06	1.46126e+07	1.26415e+07
DL-b-Hydroxycaprylic Acid	LC	159.102	461.049		fatty acid	1.58353e+07	8.10213e+06	0.511649	0.000186009	1.96045e+07	1.91457e+07	1.70271e+07	1.31455e+07	1.3333e+07	1.2756e+07	7.98163e+06	7.37567e+06	6.66994e+06	9.39546e+06	8.66216e+06	8.52792e+06
Pyruvate	LC	87.0075	94.3066	C00022		5.3692e+08	1.69904e+08	0.316442	0.000195488	5.06501e+08	4.81177e+08	5.64668e+08	5.70518e+08	5.34239e+08	5.64416e+08	6.26708e+07	5.95528e+07	9.53244e+07	6.92703e+07	3.85254e+08	3.47352e+08
L-Arginine	LC	175.119	88.7607	C00062	amino acid	2.27833e+07	1.05682e+08	4.63855	0.000206638	2.22068e+07	2.0472e+07	2.00757e+07	2.54957e+07	2.3236e+07	2.52137e+07	1.41508e+08	9.87208e+07	1.53234e+08	1.03759e+08	7.11197e+07	6.57489e+07
Metribuzin	LC	215.094	478.187	C14332	others	3.3278e+06	6.04696e+06	1.8171	0.00021025	3.33489e+06	3.59226e+06	3.27113e+06	3.17489e+06	3.12331e+06	3.47031e+06	5.10903e+06	5.43436e+06	4.71403e+06	7.79257e+06	6.76603e+06	6.46572e+06
L-Kynurenine	LC	209.092	324.572	C00328	amino acid	1.47964e+07	2.83401e+06	0.191534	0.000215943	1.12293e+07	8.69684e+06	1.0519e+07	1.94564e+07	1.89428e+07	1.99339e+07	2.45621e+06	2.33508e+06	2.5211e+06	3.82895e+06	2.84109e+06	3.02164e+06
Taurine	LC	125.987	75.9266	C00245	amino acid	2.76076e+08	1.10548e+08	0.400427	0.000223901	3.47827e+08	3.31761e+08	3.30854e+08	2.24009e+08	2.11979e+08	2.10023e+08	8.22861e+07	8.78096e+07	8.96957e+07	1.4559e+08	1.31229e+08	1.26679e+08
Guanosine	LC	284.099	307.162	C00387	others	1.79265e+08	9.07252e+07	0.506096	0.00023883	1.86762e+08	1.63763e+08	2.0332e+08	1.48224e+08	1.79708e+08	1.93811e+08	1.21622e+08	1.1779e+08	1.14011e+08	8.96048e+07	4.35592e+07	5.77642e+07
Riboflavin	LC	377.142	360.017	C00255	others	1.40177e+07	765546	0.0546129	0.000251627	9.81682e+06	7.69099e+06	8.76293e+06	1.92103e+07	1.94855e+07	1.91395e+07	107712	820858	153989	139927	937875	2.43291e+06
Kaempferol 3-O-Beta-D-Glucoside	LC	449.108	476.094	C12249	others	250362	6.30779e+06	25.1947	0.000282428	191657	161516	277995	294713	299575	276714	8.78457e+06	8.05631e+06	6.57063e+06	8.51138e+06	2.41858e+06	3.50528e+06
3,4-Dihydroxyphenyl Ethanol	LC	153.055	394.248		others	1.36144e+06	360809	0.265021	0.000301262	1.19473e+06	988819	823563	1.66303e+06	1.60781e+06	1.89068e+06	301065	694061	313182	357074	231312	268163
Ribose	GC	103.018	929.469	C00121	sugar	8.56738	5.23655	0.611219	0.000333016	8.42717	6.1772	8.09561	9.0448	9.29386	10.3657	5.48716	5.46611	4.50661	6.17565	4.93576	4.84801
Dehydro-L-(+)-Ascorbic Acid Dimer	LC	347.025	104.966		others	1.60737e+07	9.30858e+06	0.579118	0.000334663	1.63566e+07	1.61366e+07	1.50849e+07	1.60761e+07	1.58301e+07	1.6958e+07	5.11271e+06	7.45506e+06	7.43417e+06	1.11773e+07	1.25745e+07	1.20978e+07
Loperamide	LC	477.231	644.175	C07080	others	5.14356e+06	1.7448e+06	0.33922	0.000366795	5.90819e+06	5.6311e+06	6.1261e+06	4.5043e+06	4.41682e+06	4.27484e+06	11574.3	2.50304e+06	2.53382e+06	2.72456e+06	14058.8	2.68173e+06
Suberyl glycine	GC	188.078	892.881		amino acid	1.21012	11.2424	9.29037	0.00037415	0.826825	1.06698	1.17001	1.12911	1.39672	1.67106	8.24514	6.24398	6.94394	17.0168	15.5371	13.4676
L-Valine	LC	118.087	108.763	C00183		1.74989e+08	4.59597e+08	2.62643	0.000432838	1.60749e+08	1.38551e+08	1.44827e+08	2.21281e+08	1.91393e+08	1.93134e+08	6.38576e+08	5.277e+08	4.00479e+08	5.48748e+08	3.19043e+08	3.23034e+08
Piperidine	LC	86.0971	141.77	C01746	others	1.33954e+07	909166	0.0678712	0.000434093	9.88753e+06	5.99745e+06	1.18548e+07	1.1871e+07	1.8607e+07	2.21549e+07	642620	682787	1.43967e+06	664660	497023	1.52824e+06
Gluconic Acid	LC	195.05	83.6511	C00257	organic acid	2.69474e+08	1.41409e+08	0.524761	0.000472429	2.34161e+08	1.95632e+08	2.16947e+08	3.11541e+08	3.24402e+08	3.34159e+08	1.53051e+08	1.25287e+08	1.34962e+08	1.51015e+08	1.46974e+08	1.37169e+08
Isovitexin	LC	433.113	515.373	C01714	others	2.07346e+07	5.13853e+06	0.247825	0.000499476	1.76698e+07	1.5038e+07	1.5894e+07	2.37707e+07	2.57575e+07	2.62773e+07	1.01604e+07	1.01964e+07	15351.7	40189.2	77565.1	1.03412e+07
myo-Inositol	GC	217.1	1183.95	C00137	polyol	452.494	659.27	1.45697	0.000521307	398.973	362.139	371.793	510.563	511.854	559.639	681.417	707.264	603.208	727.549	595.948	640.23
Octadecanoic acid	GC	117	1243.97	C01530	fatty acid	15.6962	26.2238	1.67072	0.000538506	14.4915	12.5482	16.5015	20.2746	12.5937	17.7675	26.5512	28.464	23.4412	33.1874	23.8642	21.835
3-Hydroxy-Hexadecanoic Acid	LC	271.228	886.436		fatty acid	4.67573e+06	3.09404e+06	0.661723	0.000595816	5.18255e+06	4.81485e+06	4.92236e+06	4.50253e+06	4.68928e+06	3.94278e+06	4.11282e+06	2.62506e+06	2.22316e+06	3.33167e+06	3.36715e+06	2.90437e+06
2,4,5-Trihydroxypentanoic acid	GC	245.086	906.041		organic acid	13.686	4.37122	0.319393	0.000622226	10.7249	8.6686	9.57556	16.2942	17.0562	19.7968	4.50292	4.35016	3.26564	5.25157	4.48429	4.37276
1-Anilino-9,10-Dioxo-2-Anthroic Acid	LC	344.092	184.343		organic acid	8.88667e+06	1.3973e+06	0.157236	0.000714973	5.50827e+06	5.14048e+06	5.67137e+06	1.26833e+07	1.16356e+07	1.2681e+07	1.2237e+06	1.04406e+06	1.09607e+06	2.00303e+06	1.49155e+06	1.5254e+06
cGMP	LC	346.055	268.673	C00942	nucleotides	1.22367e+06	1.16891e+07	9.55252	0.000721953	841552	612421	847303	1.61608e+06	1.79648e+06	1.62819e+06	1.55563e+07	1.3773e+07	1.29896e+07	1.75229e+07	4.60738e+06	5.68572e+06
Mitoxantrone	LC	445.205	439.03	C11195	others	9.53187e+06	447304	0.0469272	0.00075507	5.73907e+06	4.65735e+06	5.51838e+06	1.33863e+07	1.35034e+07	1.43867e+07	427385	292653	329460	844245	192419	597661
L-Ascorbate	LC	177.04	138.472	C00072	organic acid	7.61186e+07	2.56569e+07	0.337065	0.000791636	5.82529e+07	5.69528e+07	8.1113e+07	6.99293e+07	9.40458e+07	9.64178e+07	1.27245e+07	9.30678e+06	2.61694e+06	4.29127e+07	3.88156e+07	4.75652e+07
Ethylmethylmaleimide	LC	140.071	102.854		others	6.7499e+07	9.0496e+06	0.13407	0.000824669	1.02323e+08	1.02392e+08	7.62362e+07	3.73164e+07	4.51832e+07	4.1543e+07	5.64901e+06	1.00909e+07	7.4223e+06	9.25763e+06	1.0048e+07	1.18298e+07
2-Ketoglutaric acid	GC	198.003	850.84	C00026		22.566	3.80089	0.168435	0.000826178	16.1924	10.0193	16.6801	31.5373	28.7775	32.189	5.85903	7.09698	2.37496	1.48627	4.94355	1.04458
(4S)-4-Hydroxy-L-Isoleucine	LC	148.097	104.517		amino acid	1.91362e+07	2.50034e+07	1.3066	0.000868094	1.65437e+07	1.66208e+07	1.83677e+07	2.1565e+07	2.14258e+07	2.02944e+07	2.48863e+07	2.2245e+07	2.34978e+07	2.77463e+07	2.68907e+07	2.47541e+07
Melibiose	LC	341.108	103.312	C05402	sugar	9.29052e+08	6.84813e+08	0.73711	0.000983374	9.25198e+08	7.57145e+08	8.4835e+08	1.0663e+09	1.02667e+09	9.50654e+08	6.72181e+08	5.90569e+08	6.38078e+08	7.2851e+08	7.56592e+08	7.2295e+08
Spermine	LC	203.223	67.7213	C00750	amine	4.21332e+06	574160	0.136272	0.000997881	6.38088e+06	6.48886e+06	4.80565e+06	2.34961e+06	2.70891e+06	2.54603e+06	709334	357214	515884	800918	578914	482693
Uracil	LC	113.035	168.971	C00106	others	4.44958e+07	3.06667e+07	0.689204	0.0011617	4.34429e+07	4.09547e+07	3.88638e+07	4.97571e+07	4.56762e+07	4.82799e+07	3.4885e+07	3.55127e+07	3.4832e+07	3.3503e+07	2.23583e+07	2.2909e+07
2-Deoxy-D-Ribose 5-Phosphate	LC	213.015	834.257	C00673	phosphoric acid	2.28017e+06	3.83075e+06	1.68003	0.00122438	2.3315e+06	2.37454e+06	2.27521e+06	2.14398e+06	2.27175e+06	2.28406e+06	2.86027e+06	4.44836e+06	3.07707e+06	4.21718e+06	3.38365e+06	4.998e+06
Threitol	GC	217.083	807.198	C16884	polyol	15.2208	2.5726	0.169019	0.00123293	13.3902	8.46594	6.33099	18.3066	21.8119	23.0189	2.38209	2.63823	2.62855	3.11339	2.32485	2.34848
Aspartic acid	GC	232.1	812.333	C00049		228.461	326.338	1.42842	0.00145791	223.335	247.649	217.806	211.09	228.184	242.703	295.716	281.402	263.646	395.398	370.136	351.729
13-Epi-12-Oxo Phytodienoic Acid	LC	291.196	839.835		organic acid	1.17266e+06	3.59382e+06	3.06468	0.00159218	783113	1.00555e+06	886636	1.33624e+06	1.30187e+06	1.72253e+06	4.35124e+06	4.83757e+06	4.94449e+06	3.03084e+06	1.56372e+06	2.83506e+06
(-)-Salsoline	LC	194.118	405.795	C09640	others	1.07208e+07	2.7888e+06	0.260131	0.00161472	8.17136e+06	8.2535e+06	5.66556e+06	9.97052e+06	1.68664e+07	1.53972e+07	3.65749e+06	2.97528e+06	1.21444e+06	2.33121e+06	3.9109e+06	2.64347e+06
Diosgenin	LC	415.321	603.203	C08918	others	7.65513e+06	4.25434e+06	0.55575	0.00168637	6.30607e+06	4.95551e+06	6.65411e+06	9.45153e+06	8.78746e+06	9.77609e+06	4.36525e+06	4.37644e+06	4.36859e+06	4.12997e+06	4.13648e+06	4.14929e+06
Maltitol	LC	343.124	142.891		polyol	2.07245e+07	8.35185e+06	0.402995	0.00185148	1.55212e+07	1.22226e+07	1.56928e+07	2.77959e+07	2.50067e+07	2.81075e+07	7.77209e+06	7.03716e+06	7.01571e+06	1.14405e+07	8.86384e+06	7.98184e+06
Phenylacetic Acid	LC	135.044	330.701	C07086	organic acid	4.30603e+06	1.93559e+06	0.449506	0.00222411	2.4701e+06	2.9214e+06	4.00049e+06	5.34026e+06	5.56282e+06	5.54112e+06	1.89021e+06	1.72282e+06	1.53522e+06	2.53384e+06	2.05792e+06	1.87351e+06
Diosmin	LC	607.167	554.534	C10039	others	3.26325e+06	555685	0.170286	0.00228233	1.96092e+06	1.88938e+06	2.1393e+06	4.50489e+06	4.44103e+06	4.64397e+06	1.63574e+06	1575.99	2549.92	6512.74	1.68211e+06	5626.41
D-Ribitol	LC	153.076	98.6359	C00474	polyol	1.62912e+07	6.30123e+06	0.386788	0.00229856	1.14759e+07	9.25236e+06	1.22525e+07	2.08848e+07	2.14466e+07	2.2435e+07	5.81326e+06	5.25595e+06	5.21738e+06	8.42757e+06	6.15389e+06	6.93936e+06
Aconitic Acid	LC	173.008	76.5286	C00417	organic acid	1.89608e+07	5.62447e+07	2.96636	0.00237505	2.09629e+07	2.22026e+07	2.4225e+07	4.90063e+06	3.82364e+07	3.23758e+06	6.26058e+07	5.31218e+07	7.58503e+07	7.19873e+07	2.52447e+07	4.86585e+07
Tris(1-Chloro-2-Propyl)Phosphate	LC	327.008	852.009		phosphoric acid	5.2001e+07	5.42721e+07	1.04367	0.00249371	5.22491e+07	5.31313e+07	5.15125e+07	5.28977e+07	5.10031e+07	5.12124e+07	5.41996e+07	5.46558e+07	5.59672e+07	5.45166e+07	5.30382e+07	5.32554e+07
Nicotinamide	LC	123.056	141.728	C00153	others	9.56411e+07	5.47233e+07	0.572174	0.00259371	1.02712e+08	8.4495e+07	8.45718e+07	1.08022e+08	9.73123e+07	9.6734e+07	7.50399e+07	7.6058e+07	7.14099e+07	5.22731e+07	2.67339e+07	2.68251e+07
Vanillin	LC	151.039	628.841	C00755	others	2.47213e+06	2.01567e+06	0.815355	0.00268908	2.42988e+06	2.2218e+06	2.18958e+06	2.59414e+06	2.47903e+06	2.91839e+06	2.02776e+06	1.94925e+06	2.15896e+06	2.01893e+06	1.89535e+06	2.04376e+06
4-Aminobutyric acid	GC	174.083	818.748	C00334	amino acid	33.1493	50.3373	1.5185	0.00271053	33.187	28.1853	31.149	33.5076	31.9937	40.8731	66.0443	52.1668	44.8874	56.2578	41.4984	41.1693
9(S)-HpOTrE	LC	309.207	773.054	C16321	others	1.57149e+07	4.95897e+06	0.315559	0.00277961	8.51437e+06	1.23247e+07	1.04301e+07	1.94155e+07	2.12555e+07	2.23492e+07	5.15798e+06	9.85501e+06	3.97895e+06	6.57432e+06	2.18961e+06	1.99795e+06
Uric Acid	LC	167.02	99.1891	C00366	organic acid	4.18802e+06	546104	0.130397	0.00281774	2.00115e+06	2.02676e+06	2.44022e+06	5.92517e+06	6.86753e+06	5.86728e+06	741194	553746	835172	512508	351173	282832
Ribonic acid	GC	103.013	981.132	C01685	organic acid	28.8027	46.905	1.62849	0.00329282	24.6032	23.4451	24.4961	30.9321	32.8504	36.4892	61.255	53.0802	45.1095	34.492	36.5948	50.8987
L-Phenylalanine	LC	166.086	352.609	C00079	amino acid	3.72975e+08	6.27838e+08	1.68333	0.00349351	3.41016e+08	3.09807e+08	3.10137e+08	4.30009e+08	4.04854e+08	4.42025e+08	8.16058e+08	6.98673e+08	6.92087e+08	6.77948e+08	4.3005e+08	4.52213e+08
Keto-D-Fructose	LC	180.087	95.6195	C10906	sugar	1.19225e+07	3.25927e+07	2.73371	0.00373252	1.24947e+07	1.28582e+07	1.29683e+07	1.48059e+07	7.49536e+06	1.09125e+07	5.08539e+07	3.57227e+07	4.49466e+07	2.20541e+07	2.10031e+07	2.09756e+07
Malic Acid	LC	133.013	77.4235	C00149	organic acid	1.58221e+09	1.3218e+09	0.835412	0.00436706	1.65647e+09	1.63237e+09	1.83898e+09	1.49204e+09	1.3807e+09	1.49269e+09	1.32336e+09	1.3479e+09	1.42945e+09	1.25062e+09	1.26224e+09	1.3172e+09
Mannitol	GC	217.1	1095.38	C00392	polyol	27.8786	35.5142	1.27389	0.00444437	25.7916	30.8278	32.046	30.3725	24.6835	23.5502	40.3316	38.1095	31.8468	37.6707	32.3807	32.7457
N,N-Diethyl-M-Toluamide	LC	192.138	790.398	C10935	others	1.81371e+07	1.41211e+07	0.778579	0.00461801	1.78581e+07	1.58898e+07	1.66583e+07	1.91518e+07	1.94791e+07	1.97853e+07	1.53701e+07	1.64422e+07	1.63612e+07	1.26106e+07	1.24077e+07	1.15351e+07
Farnesyl Acetone	LC	263.237	885.643		others	2.37648e+06	7.50289e+06	3.15714	0.00473398	2.25005e+06	2.4133e+06	2.27398e+06	2.49501e+06	1.96858e+06	2.85796e+06	4.3516e+06	6.02706e+06	1.1309e+07	1.24476e+07	5.01474e+06	5.86727e+06
Biochanin A	LC	285.076	824.674	C00814	others	3.69898e+08	1.71561e+06	0.00463807	0.00496487	1.59654e+08	1.24335e+08	1.40708e+08	5.72066e+08	6.41559e+08	5.81066e+08	1.69764e+06	448636	884337	4.98933e+06	1.56058e+06	713144
Koparin 2-Methyl Ether	LC	315.086	837.236		others	7.66164e+07	371204	0.00484496	0.00498706	3.20843e+07	2.34159e+07	3.23005e+07	1.17346e+08	1.24477e+08	1.30074e+08	321801	87859.6	177802	913687	283981	442092
Indole-3-Carbaldehyde	LC	146.06	409.745	C08493	others	4.7174e+06	6.32993e+06	1.34183	0.005299	3.56786e+06	4.73198e+06	6.27461e+06	4.90555e+06	4.39122e+06	4.43318e+06	6.23438e+06	5.75123e+06	6.96774e+06	6.65801e+06	5.36803e+06	7.00016e+06
Benzoic acid	GC	178.993	591.862	C00180	organic acid	3.1326	3.62586	1.15746	0.0063923	3.12788	3.03485	3.08149	3.40531	2.7549	3.39119	3.77486	3.86442	3.1965	3.82766	3.49208	3.59962
Urocanic Acid	LC	139.05	172.648	C00785	organic acid	3.78369e+06	7.20686e+06	1.90472	0.00806395	3.23597e+06	3.36878e+06	4.59302e+06	3.12866e+06	4.24385e+06	4.13183e+06	7.46714e+06	8.58898e+06	1.11083e+07	5.0739e+06	4.29752e+06	6.70526e+06
Hydrocinnamic Acid	LC	151.076	332.247	C05629	organic acid	5.53774e+07	7.07609e+07	1.27779	0.0081388	5.48105e+07	4.87649e+07	5.62059e+07	5.6389e+07	5.75784e+07	5.85157e+07	6.31238e+07	5.73167e+07	6.92142e+07	8.87979e+07	7.00739e+07	7.60387e+07
1-Oleoyl Lysophosphatidic Acid	LC	435.252	896.538	C00416	fatty acid	536708	3.51605e+06	6.55115	0.00823207	596055	633272	447816	457573	484013	601522	5.06899e+06	5.03378e+06	6.33919e+06	2.04139e+06	1.17861e+06	1.43436e+06
Parabanic acid	GC	100.018	795.967		organic acid	0.820333	2.2912	2.79301	0.00832567	0.737136	0.657164	0.744747	0.967146	0.88459	0.931217	2.74484	2.61598	2.61203	0.0744198	2.77104	2.92889
Sinapic Acid	LC	223.061	365.589	C00482	organic acid	5.33584e+06	2.56522e+06	0.480754	0.00840358	4.74103e+06	3.66698e+06	2.8572e+06	7.33077e+06	6.40004e+06	7.019e+06	3.2592e+06	3.32565e+06	2.60706e+06	3.33257e+06	1.24402e+06	1.62286e+06
O-Toluic Acid	LC	135.044	540.609	C07215	organic acid	3.54825e+06	2.01273e+06	0.567245	0.00931683	3.1829e+06	2.07507e+06	2.59131e+06	4.11645e+06	4.46047e+06	4.86331e+06	1.71376e+06	1.84274e+06	1.5091e+06	2.54897e+06	2.19853e+06	2.26327e+06
Uridine	LC	243.062	173.505	C00299	others	2.96462e+07	1.91781e+07	0.646901	0.00958125	3.15787e+07	2.55577e+07	2.75934e+07	3.29156e+07	2.62628e+07	3.39688e+07	2.55797e+07	2.43083e+07	2.36833e+07	2.11038e+07	8.77711e+06	1.16165e+07
Salidroside	LC	299.113	405.805	C06046	others	2.75472e+06	145126	0.0526826	0.0102587	663195	1.00577e+06	6.34543e+06	3.18258e+06	2.66501e+06	2.66635e+06	118666	92707.6	119093	189685	155017	195585
Sphinganine	LC	302.306	864.824	C00836	others	2.57118e+07	1.53712e+07	0.597826	0.0131645	2.49456e+07	3.14627e+07	2.85926e+07	2.41821e+07	2.19319e+07	2.31562e+07	1.93599e+07	1.77844e+07	323104	1.50453e+07	1.91846e+07	2.05299e+07
L-Leucine	LC	130.086	169.385	C00123		6.8589e+06	1.53562e+07	2.23887	0.0137367	4.82557e+06	6.51584e+06	3.67864e+06	8.60958e+06	8.47477e+06	9.049e+06	2.34735e+07	1.92305e+07	1.81455e+07	1.57391e+07	5.0546e+06	1.0494e+07
9(S)-HpODE	LC	311.223	746.393	C14827	others	181225	509327	2.81047	0.0147704	127928	165680	118878	210714	244337	219814	731862	747670	703728	506916	144656	221130
8-Cyclopentyltheophylline	LC	247.118	321.044		others	3.49229e+06	1.08682e+06	0.311207	0.0156266	1.88861e+06	1.42141e+06	1.71376e+06	5.38311e+06	5.29481e+06	5.25201e+06	889568	734851	1.17775e+06	1.71693e+06	954128	1.04771e+06
Urea	GC	189.045	583.189	C00086	others	5.28733	7.42112	1.40357	0.0159179	4.39315	4.89036	4.80917	6.69879	5.75645	5.17607	9.43595	7.86437	8.53143	7.67031	5.39374	5.63094
Aurin	LC	291.105	141.661	C14213	others	9.701e+07	2.85268e+07	0.294061	0.0164283	4.16352e+07	3.76626e+07	5.46291e+07	1.39409e+08	1.58234e+08	1.50491e+08	2.36412e+07	2.39375e+07	2.29703e+07	3.73634e+07	2.87005e+07	3.45481e+07
ADMA	LC	203.15	100.97	C03626	others	3.94402e+07	5.28251e+07	1.33937	0.0165023	3.25928e+07	3.35888e+07	4.24236e+07	4.4206e+07	4.18158e+07	4.20144e+07	4.77839e+07	4.02313e+07	4.59904e+07	6.83977e+07	5.9726e+07	5.48212e+07
Buddleoflavonoloside	LC	593.187	641.299		others	7.58239e+06	2.46131e+06	0.324608	0.0172903	4.58382e+06	3.19374e+06	4.20329e+06	1.04718e+07	1.14389e+07	1.16027e+07	3.65011e+06	3.66643e+06	3.69296e+06	11482	3.72067e+06	26195.6
2-Phenylethyl 2-O-D-Xylopyranosyl-D-Glucopyranoside	LC	415.161	500.034		others	717515	1.60796e+06	2.24101	0.0185198	457559	333687	448708	999305	990153	1.07568e+06	1.08442e+06	917703	1.0123e+06	2.6123e+06	2.07438e+06	1.94665e+06
Palmitoyl Serinol	LC	330.3	818.944		others	1.07619e+07	1.04086e+06	0.0967173	0.0187187	2.74138e+06	2.95171e+06	3.34801e+06	1.84403e+07	1.81947e+07	1.88954e+07	1.02279e+06	1.06001e+06	1.03568e+06	864991	746653	1.51507e+06
9,10-DiHOME	LC	313.238	810.634	C14828	others	558498	3.02133e+06	5.40974	0.0198853	557238	569963	435822	541788	706130	540044	4.83467e+06	4.79225e+06	5.20185e+06	2.07784e+06	477646	743701
Stearidonic Acid	LC	275.201	860.611	C16300	fatty acid	187707	876471	4.66935	0.0214312	226179	213634	155676	179871	154655	196228	1.3855e+06	1.58491e+06	1.27614e+06	616627	148100	247558
3-Methoxytyramine	LC	168.102	332.247	C05587	others	1.98424e+07	2.45346e+07	1.23647	0.0238968	1.92115e+07	1.67718e+07	2.03112e+07	1.99854e+07	2.10294e+07	2.17454e+07	2.12923e+07	2.00197e+07	2.36384e+07	3.10644e+07	2.46874e+07	2.65056e+07
Cytosine	LC	112.051	104.013	C00380	others	4.46544e+07	2.84459e+07	0.637024	0.0247099	4.6447e+07	4.82194e+07	5.3121e+07	3.9366e+07	3.92482e+07	4.15247e+07	4.32375e+07	3.59684e+07	3.52845e+07	3.4417e+07	1.01391e+07	1.16289e+07
Phenylalanine	GC	218.092	888.71	C00079		18.3873	12.6698	0.689054	0.0286672	15.6601	12.42	14.9267	21.356	21.8981	24.0627	11.0788	11.9018	9.25371	17.6666	14.037	12.0812
Bilobalide	LC	325.093	178.463	C07605	others	1.37312e+06	1.04567e+06	0.761525	0.0295066	1.191e+06	1.04475e+06	1.15819e+06	1.45227e+06	1.68594e+06	1.70657e+06	1.05658e+06	851728	1.04708e+06	1.26546e+06	1.09884e+06	954298
13(S)-HpOTrE	LC	309.207	810.522	C04785	others	2.3397e+07	1.33447e+07	0.570358	0.0312882	2.13592e+07	2.14719e+07	1.49447e+07	2.64878e+07	2.89837e+07	2.71346e+07	1.831e+07	1.95057e+07	2.3997e+07	9.10653e+06	3.58029e+06	5.56845e+06
Methionine	GC	176.054	811.049	C00073		7.7788	5.73873	0.73774	0.0317125	6.82053	5.64569	6.70019	8.30342	9.70991	9.49304	5.20285	5.33741	4.42437	7.7039	6.33031	5.43357
1-Palmitoyl Lysophosphatidic Acid	LC	409.236	889.152	C04036	fatty acid	2.45325e+06	9.64713e+06	3.93238	0.0327385	2.36236e+06	2.56592e+06	1.91644e+06	2.74235e+06	2.33593e+06	2.79652e+06	1.61286e+07	1.49453e+07	1.72013e+07	3.91523e+06	3.08894e+06	2.60351e+06
Prim-O-Glucosylcimifugin	LC	469.168	385.216		others	2.63485e+06	886138	0.336315	0.0354387	1.3756e+06	1.08044e+06	1.01822e+06	3.92853e+06	4.33026e+06	4.07601e+06	11336.1	1.26723e+06	13927.1	1.3509e+06	1.34221e+06	1.33122e+06
Choline	LC	104.107	90.9904	C00114	others	1.89021e+09	1.55087e+09	0.820472	0.0365172	1.57488e+09	1.57892e+09	1.62328e+09	2.25718e+09	2.05581e+09	2.25123e+09	1.51659e+09	1.58208e+09	1.4962e+09	1.70077e+09	1.53327e+09	1.47629e+09
(R)-Carnitine	LC	162.113	103.944	C00318	others	1.65566e+08	9.22797e+07	0.55736	0.0434723	9.55109e+07	9.06111e+07	1.08618e+08	2.40893e+08	2.38897e+08	2.18864e+08	6.66353e+07	6.2719e+07	1.09829e+08	1.16649e+08	9.88174e+07	9.90284e+07
S-Adenosylmethionine	LC	399.145	90.0231	C00019	amino acid	7.10673e+06	9.76341e+06	1.37382	0.0463998	4.09571e+06	4.15274e+06	7.00164e+06	7.16045e+06	1.01069e+07	1.0123e+07	8.6462e+06	1.01014e+07	1.07949e+07	8.84919e+06	9.19256e+06	1.09962e+07
S-Allyl-L-Cysteine	LC	160.043	230.039	C16759	amino acid	8.54827e+06	1.19039e+07	1.39255	0.0483679	1.21433e+07	9.23753e+06	1.18818e+07	6.01795e+06	6.10739e+06	5.90164e+06	1.28811e+07	1.13685e+07	1.51041e+07	1.28622e+07	9.65151e+06	9.55597e+06
2-Glucosyloxy-4-Methoxycinnamic Acid	LC	355.103	304.534		organic acid	1.79655e+06	1.24463e+06	0.692793	0.0528966	1.30303e+06	1.40425e+06	1.20475e+06	2.53083e+06	2.16042e+06	2.17599e+06	1.34749e+06	956167	1.10331e+06	1.65828e+06	1.35128e+06	1.05127e+06
Tyrosine	GC	179.036	1088.18	C00082		2.29322	1.59228	0.694341	0.0541735	1.96676	1.57578	1.98269	2.45844	2.86554	2.91012	1.25883	1.65592	0.751101	2.33545	2.09509	1.45728
gamma-Terpinene	LC	137.133	708.37	C09900	others	2.44728e+06	3.94371e+06	1.61147	0.0549069	924174	3.59751e+06	852146	3.96014e+06	4.122e+06	1.22769e+06	4.49575e+06	4.54089e+06	4.22926e+06	3.56333e+06	3.32248e+06	3.51054e+06
3-Methyl Pyruvic Acid	LC	101.023	77.2747	C00109	organic acid	1.89147e+07	1.39163e+07	0.73574	0.0556034	1.75192e+07	1.38928e+07	1.40054e+07	2.2931e+07	2.17469e+07	2.33928e+07	9.96031e+06	9.39302e+06	1.56839e+07	1.64104e+07	1.37856e+07	1.82645e+07
8(9)-Eet Methyl Ester	LC	335.258	851.504		others	1.08449e+07	7.38654e+06	0.681105	0.0566453	6.84534e+06	1.1664e+07	6.98408e+06	1.24892e+07	1.23832e+07	1.47038e+07	3.71392e+06	5.59745e+06	9.16566e+06	8.37231e+06	7.925e+06	9.54488e+06
2-Oxoglutaric Acid	LC	145.013	78.4923	C00026	organic acid	9.70326e+07	6.69148e+07	0.689612	0.0578413	8.23635e+07	6.34086e+07	7.06375e+07	1.23619e+08	1.15476e+08	1.26691e+08	4.56318e+07	4.16771e+07	7.06102e+07	8.85184e+07	6.83995e+07	8.66518e+07
Seleno-L-Methionine	LC	198.001	356.759	C05335	amino acid	1.64611e+07	3.08291e+07	1.87285	0.0609623	1.45022e+07	1.31839e+07	1.78324e+07	2.2438e+07	1.62134e+07	1.45968e+07	2.60062e+07	1.53962e+07	1.53276e+07	5.20712e+07	4.98347e+07	2.6339e+07
Monomethylphosphate	GC	241	534.414		phosphoric acid	21.4226	28.9145	1.34972	0.0629394	21.8713	18.8128	11.5379	23.0767	20.8033	32.4338	23.8553	35.9035	32.4518	26.0115	22.2905	32.9746
N-Acetylsulfadiazine	LC	293.067	105.066		others	7.39154e+07	5.35899e+07	0.725017	0.0750916	4.62902e+07	4.93888e+07	6.60546e+07	9.21983e+07	9.63802e+07	9.31802e+07	4.75443e+07	4.48411e+07	4.42582e+07	6.9912e+07	5.94887e+07	5.54954e+07
Nonanedioic Acid	LC	187.097	242.389	C08261	organic acid	1.75954e+06	1.37968e+06	0.784116	0.0765488	1.52106e+06	1.51233e+06	1.29741e+06	1.83501e+06	2.21602e+06	2.17541e+06	1.76868e+06	1.41432e+06	1.42823e+06	1.51635e+06	947457	1.20306e+06
N-Methylnicotinate	LC	138.055	453.675	C01004	others	8.21141e+06	6.38603e+06	0.777701	0.0765839	6.57598e+06	5.64568e+06	6.83538e+06	1.0228e+07	1.05031e+07	9.48035e+06	6.84426e+06	5.34674e+06	5.43043e+06	7.51009e+06	6.51755e+06	6.6671e+06
Phosphatidylinositol Lyso 18:1	LC	597.304	855.124		others	480941	339164	0.70521	0.0798394	398474	639693	450041	468595	441803	487038	183684	246047	455355	597633	237920	314347
Thymidine	LC	241.083	348.16	C00214	others	1.16371e+06	455803	0.391682	0.0807221	1.77451e+06	2.54219e+06	1.03057e+06	572663	522047	540276	695734	907799	538120	420347	84432.1	88387.1
Sinapyl Aldehyde	LC	207.066	718.245	C05610	others	769014	1.02277e+06	1.32998	0.0839776	597100	428833	616875	1.07414e+06	1.01929e+06	877847	1.31747e+06	812075	880064	1.16527e+06	1.06233e+06	899431
4-Hydroxycoumarin	LC	163.039	130.606	C20414	others	3.39535e+07	2.27458e+07	0.669911	0.0905277	2.20115e+07	2.39928e+07	3.58149e+07	2.73459e+07	6.05367e+07	3.40189e+07	1.83823e+07	1.94495e+07	2.05271e+07	2.84003e+07	2.59939e+07	2.37218e+07
Oxalic acid	GC	133	499.437	C00209	organic acid	11.935	15.8711	1.32979	0.0989378	7.02208	14.7714	8.33522	13.228	15.422	12.8315	9.94189	18.3925	11.8748	19.3672	19.1189	16.5311
2,3-Dihydroxybenzoic Acid	LC	153.018	450.993	C00196	organic acid	2.07108e+06	4.88479e+06	2.35857	0.10996	381526	1.58816e+06	407804	3.12424e+06	3.72827e+06	3.19646e+06	5.03968e+06	3.24946e+06	3.05057e+06	1.21266e+07	2.96128e+06	2.88113e+06
Rhodomyrtoxin	LC	429.189	496.621		others	9.18877e+06	6.05319e+06	0.65876	0.110178	5.91728e+06	4.94237e+06	5.36859e+06	1.26162e+07	1.26332e+07	1.3655e+07	5.13639e+06	5.20453e+06	4.29011e+06	7.51695e+06	6.79187e+06	7.3793e+06
HoPhe-His-OH	LC	425.142	458.901		others	3.30361e+07	2.55969e+07	0.774815	0.112674	2.61796e+07	2.06683e+07	2.56763e+07	4.34786e+07	4.11974e+07	4.10163e+07	2.43815e+07	2.19884e+07	2.23896e+07	3.04543e+07	2.6149e+07	2.82184e+07
L-Methionine	LC	150.059	142.299	C00073		6.80306e+07	9.8186e+07	1.44326	0.117738	6.7809e+07	5.96631e+07	6.17634e+07	7.36782e+07	7.00728e+07	7.51974e+07	1.55132e+08	1.22518e+08	1.15157e+08	9.9522e+07	4.44547e+07	5.23319e+07
Deoxyadenosine	LC	252.109	306.53	C00559	others	1.61325e+07	5.95004e+06	0.368824	0.119529	2.33643e+07	4.06901e+07	1.61345e+07	5.59494e+06	4.93065e+06	6.08033e+06	9.06223e+06	1.13369e+07	5.99182e+06	6.5113e+06	1.39712e+06	1.40082e+06
Nicotinamide adenine dinucleotide (NAD)	LC	662.101	143.153	C00003	nucleotides	118951	428507	3.60237	0.134701	173955	171131	169105	6363.48	170698	22456.1	184277	180459	6450.58	172550	1.05141e+06	975896
Kaempferol	LC	287.055	655.425	C05903	others	565072	2.17474e+06	3.84861	0.137361	629748	350788	142332	719020	724568	823977	3.44495e+06	1.40122e+06	6.49793e+06	246564	1.30027e+06	157521
Succinic Acid	LC	117.018	78.4184	C00042	organic acid	5.43165e+07	6.31818e+07	1.16322	0.138847	5.85353e+07	5.1384e+07	5.55463e+07	5.34684e+07	5.39835e+07	5.29812e+07	8.09895e+07	6.81405e+07	6.52081e+07	6.96269e+07	4.58655e+07	4.92602e+07
Sulfadoxine	LC	309.063	83.1475	C07630	amine	1.6548e+07	1.84992e+07	1.11791	0.141038	1.64048e+07	1.43057e+07	1.29499e+07	1.93438e+07	1.67446e+07	1.95392e+07	2.08173e+07	1.82634e+07	1.94399e+07	1.70878e+07	1.80841e+07	1.7303e+07
Pipecolic Acid	LC	130.087	141.357	C00408	organic acid	2.70719e+07	3.22875e+07	1.19266	0.159727	3.1206e+07	2.9945e+07	3.74276e+07	1.75188e+07	2.4018e+07	2.23157e+07	3.33709e+07	2.62049e+07	3.68742e+07	3.62687e+07	2.7634e+07	3.33721e+07
4-Formyl Indole	LC	144.044	602.509		others	2.67131e+06	2.355e+06	0.88159	0.163894	3.51989e+06	2.42203e+06	2.3328e+06	2.96107e+06	2.37484e+06	2.41725e+06	2.14472e+06	2.51414e+06	2.66789e+06	2.3293e+06	2.25398e+06	2.21999e+06
L-Cystine	LC	239.128	790.475	C00491	amino acid	1.24723e+07	1.13332e+07	0.908666	0.16948	1.10799e+07	1.17049e+07	1.03771e+07	1.3969e+07	1.39398e+07	1.37633e+07	1.19445e+07	1.13373e+07	9.40031e+06	1.19269e+07	1.18578e+07	1.15324e+07
4-Hydroxy-L-Proline	LC	129.975	131.147	C01015	amino acid	1.09231e+07	1.04789e+07	0.959335	0.169878	1.0697e+07	1.1449e+07	1.12968e+07	1.07624e+07	1.05788e+07	1.07544e+07	9.75364e+06	1.00944e+07	9.92494e+06	1.11472e+07	1.12433e+07	1.07099e+07
Kaempferide	LC	301.071	724.119	C10098	others	2.27722e+06	1.1449e+06	0.502762	0.183927	1.08637e+06	943542	558168	3.77454e+06	3.41943e+06	3.88124e+06	1.34543e+06	772449	3.33396e+06	307198	900000	210342
12-OPDA	LC	293.211	700.798	C01226	others	8.99405e+06	6.80249e+06	0.756332	0.185476	7.54966e+06	8.69371e+06	5.60418e+06	9.96154e+06	1.01256e+07	1.20296e+07	9.80113e+06	9.82791e+06	7.34485e+06	7.54071e+06	2.64915e+06	3.65118e+06
Adenosine 3-Monophosphate	LC	346.056	312.834	C01367	nucleotides	2.24553e+06	1.68934e+06	0.752312	0.197236	1.63529e+06	1.38324e+06	2.28516e+06	2.99872e+06	2.34301e+06	2.82774e+06	2.23517e+06	1.6935e+06	2.10282e+06	2.53166e+06	683918	888955
Dexrazoxane	LC	267.114	833.335		amine	1.27131e+06	1.50835e+06	1.18645	0.221536	1.54165e+06	1.29529e+06	1.34129e+06	1.15084e+06	1.16527e+06	1.13351e+06	1.91492e+06	948668	1.01695e+06	1.70746e+06	1.66198e+06	1.80012e+06
Inosine	LC	267.073	310.6	C00294	others	561518	888467	1.58226	0.226707	596757	559646	541524	598568	446061	626555	1.92525e+06	919469	1.23047e+06	613051	320124	322437
Hypoxanthine	LC	137.046	307.161	C00262	others	2.31886e+06	3.30032e+06	1.42325	0.229265	2.89517e+06	1.5562e+06	2.87199e+06	2.7133e+06	995116	2.88142e+06	5.17139e+06	4.00838e+06	5.09762e+06	2.4539e+06	1.53727e+06	1.53337e+06
Fumaric acid	GC	245.026	673.372	C00122	organic acid	149.064	177.416	1.1902	0.242911	107.319	78.1176	178.378	190.326	163.651	176.59	200.31	231.964	174.246	152.815	152.176	152.985
Diphenylamine	LC	170.097	899.378	C11016	amine	2.28707e+07	2.33991e+07	1.0231	0.243829	2.31361e+07	2.28537e+07	2.22743e+07	2.31826e+07	2.27422e+07	2.30352e+07	2.37172e+07	2.41969e+07	2.46062e+07	2.18938e+07	2.27684e+07	2.32118e+07
Thymine	LC	127.05	348.414	C00178	others	3.33784e+06	2.283e+06	0.683975	0.246714	4.42494e+06	6.34287e+06	3.1565e+06	1.68279e+06	2.01331e+06	2.40663e+06	2.23457e+06	2.44741e+06	2.00202e+06	1.7258e+06	946240	4.34195e+06
Traumatic Acid	LC	227.128	441.661	C16308	fatty acid	4.46225e+06	5.59575e+06	1.25402	0.266532	3.83827e+06	4.27826e+06	2.91275e+06	5.20105e+06	4.653e+06	5.89016e+06	7.63904e+06	6.22802e+06	5.38304e+06	7.91113e+06	2.50262e+06	3.91062e+06
gamma-Glu-Leu	LC	259.13	142.437		amino acid	629272	954135	1.51625	0.269408	834724	726556	428246	679286	495789	611033	1.96929e+06	1.21723e+06	1.19099e+06	882641	231338	233322
(R)-Pantothenic Acid	LC	218.103	159.611	C00864	organic acid	8.91842e+06	7.10362e+06	0.796512	0.301098	1.04061e+07	5.15734e+06	5.98583e+06	1.29343e+07	7.21733e+06	1.18097e+07	9.79295e+06	4.66127e+06	9.01284e+06	8.85773e+06	6.41167e+06	3.88527e+06
Flavin adenine dinucleotide (FAD)	LC	784.15	372.373	C00016	nucleotides	745873	797906	1.06976	0.302687	610161	647653	720193	813091	852521	831618	786014	746465	715173	846206	840792	852786
13(S)-HOTrE	LC	293.212	867.631	C16316	others	3.45749e+07	2.70913e+07	0.783555	0.312413	3.32724e+07	3.13853e+07	2.28892e+07	3.73438e+07	3.96626e+07	4.28961e+07	4.24512e+07	4.44126e+07	3.27059e+07	2.49429e+07	7.03337e+06	1.1002e+07
Carbendazim	LC	192.077	426.942	C10897	others	676278	4.12484e+06	6.09932	0.319614	686812	339694	1.17289e+06	211869	571050	1.07536e+06	1.03971e+06	1.90228e+06	2.05247e+07	350412	246479	685448
Lactic acid	GC	117.004	424.666	C00186		35.919	31.244	0.869845	0.329603	31.8575	31.4761	34.9292	38.8955	29.6468	48.7091	27.9969	29.2156	19.1478	35.269	30.5324	45.3022
Acitretin	LC	325.184	879.424	D02754	others	1.40967e+07	1.59986e+07	1.13492	0.332583	1.42398e+07	1.42625e+07	1.1985e+07	1.36593e+07	1.54114e+07	1.5022e+07	1.28546e+07	1.29671e+07	1.3023e+07	1.77426e+07	1.5287e+07	2.41172e+07
Lauryl Diethanolamide	LC	288.254	876.856		others	1.57713e+08	1.47369e+08	0.934415	0.336625	1.79013e+08	1.44804e+08	1.44537e+08	1.72774e+08	1.62914e+08	1.42233e+08	1.7598e+08	1.35832e+08	1.22527e+08	1.49522e+08	1.38469e+08	1.61883e+08
2,3-Dihydroxybutanedioic acid	GC	117.021	875.554		organic acid	3.69529	4.45392	1.2053	0.339402	2.01424	1.88132	2.3691	4.84545	5.24483	5.8168	4.79438	4.94047	3.9256	4.86559	4.12009	4.07742
Maltose	LC	341.109	142.891	C00208	sugar	1.42487e+07	1.71253e+07	1.20189	0.342959	9.39814e+06	8.53928e+06	9.27114e+06	2.16196e+07	1.89482e+07	1.77156e+07	1.45687e+07	1.33647e+07	1.43544e+07	2.4245e+07	1.78198e+07	1.83991e+07
Dibutyl Phthalate	LC	279.159	854.981	C14214	others	2.58329e+07	2.92376e+07	1.1318	0.34382	2.12306e+07	2.84443e+07	1.99177e+07	2.19866e+07	3.76175e+07	2.58005e+07	2.39654e+07	3.51946e+07	2.69294e+07	3.36208e+07	3.25443e+07	2.31713e+07
Kinetin	LC	214.073	519.5	C08272	others	1.79614e+06	55979.7	0.0311667	0.344052	30494	19528.9	21436.2	73916.7	1.05566e+07	74880.8	63675.4	59798.6	31092.8	82450	41365.5	57495.8
2-Keto-gluconic acid	GC	292.1	989.155	C06473	organic acid	31.3939	33.8976	1.07975	0.35445	27.4383	26.421	29.2714	33.3747	34.2723	37.5858	36.0307	35.3928	25.0762	38.1289	35.1036	33.6534
Triptophenolide	LC	311.168	852.603		organic acid	9.52302e+06	1.03794e+07	1.08992	0.363116	1.01639e+07	9.07487e+06	8.53496e+06	8.48992e+06	1.03221e+07	1.05523e+07	9.14864e+06	9.32583e+06	9.72491e+06	1.08208e+07	9.02896e+06	1.4227e+07
Itaconic Acid	LC	129.018	77.9072	C00490	organic acid	2.1595e+07	2.67702e+07	1.23965	0.363494	2.49613e+07	1.95116e+07	1.79678e+07	2.16734e+07	2.22121e+07	2.32437e+07	4.41801e+07	3.24149e+07	3.76955e+07	1.85872e+07	1.34196e+07	1.43239e+07
Epsilon-Caprolactam	LC	114.092	152.662	C06593	others	1.85266e+07	2.23242e+07	1.20498	0.383931	1.89706e+07	2.25278e+07	1.88735e+07	1.65042e+07	2.41717e+07	1.0112e+07	2.07273e+07	1.45868e+07	1.89968e+07	2.04788e+07	3.99836e+07	1.9172e+07
Parbenate	LC	194.118	870.873		others	1.07927e+07	7.09762e+06	0.657631	0.38761	2.13989e+07	1.52279e+06	2.02622e+07	1.42586e+07	2.56365e+06	4.75014e+06	2.24875e+06	1.53669e+06	7.82344e+06	1.30416e+07	9.40601e+06	8.5292e+06
Megastigmatrienone	LC	191.143	504.175		others	1.05958e+07	1.24093e+07	1.17116	0.392344	7.78767e+06	5.05197e+06	8.75579e+06	1.42919e+07	1.37841e+07	1.39031e+07	1.15083e+07	1.08939e+07	8.82839e+06	1.79219e+07	1.30077e+07	1.22956e+07
Alanine	GC	116.09	464.136	C00041	amino acid	1039.92	921.321	0.885955	0.405865	845.813	620.285	879.186	1242.51	1268.16	1383.55	1134.8	1039.17	802.57	935.433	878.947	737.007
Diphenylurea	LC	211.087	797.927		others	129139	323640	2.50615	0.407574	101633	42955	43107.1	46170.2	511562	29404.3	99009.7	82315.3	190956	160964	34461.1	1.37414e+06
2-Isopropylmalic Acid	LC	175.06	95.6084	C02504	organic acid	1.45092e+08	1.63004e+08	1.12345	0.408643	1.7155e+08	1.36819e+08	1.3551e+08	1.55848e+08	1.34188e+08	1.36638e+08	2.45652e+08	1.36809e+08	1.73578e+08	1.80266e+08	1.32977e+08	1.0874e+08
Isoleucine	GC	158.1	634.541	C00407	amino acid	24.7687	28.0839	1.13385	0.414131	18.8498	15.4483	19.0909	29.4041	32.8273	32.992	28.1675	26.7174	19.9509	36.4184	30.6135	26.6358
13(R)-HODE	LC	295.228	876.033		others	1.30415e+06	1.51904e+06	1.16477	0.463437	1.44357e+06	1.37163e+06	1.06386e+06	1.35132e+06	1.12814e+06	1.46641e+06	2.3861e+06	1.94995e+06	1.91334e+06	1.2938e+06	679887	891153
Valine	GC	144.092	567.789	C00183		67.8556	62.278	0.917802	0.475466	59.7638	47.2916	57.4802	75.6927	80.0668	86.8385	66.6697	61.2607	46.1084	77.302	64.3842	57.9432
Leucine	GC	158.1	615.928	C00123		54.9421	61.1515	1.11302	0.475912	42.8064	33.4099	44.1908	64.4833	71.3954	73.3669	58.8034	58.942	45.2329	80.8695	65.2533	57.8077
Maltopentaose	LC	827.267	143.48		sugar	1.12176e+06	1.33139e+06	1.18687	0.481873	810934	2.02286e+06	1.61946e+06	153088	1.05991e+06	1.06433e+06	1.40764e+06	1.68079e+06	1.56221e+06	1.0966e+06	972700	1.26838e+06
Glycerophosphocholine	LC	258.11	91.8573	C00670	others	3.55568e+07	4.52976e+07	1.27395	0.486129	3.38145e+06	3.32411e+06	1.76362e+07	5.39078e+07	6.58645e+07	6.92264e+07	4.91545e+07	3.76038e+07	3.4992e+07	3.56431e+07	5.00703e+07	6.43221e+07
Sucrose	GC	361.2	1460.59	C00089	sugar	10847.3	10569	0.974345	0.49474	10781.9	9870.59	10255.2	11039	11336.1	11801.2	10784.2	11127	9474.12	11146.1	10765.6	10117.3
Chlorogenic Acid	LC	353.082	331.062	C00852	organic acid	302025	486505	1.61081	0.505108	130800	141445	304964	463630	390665	380646	1.57972e+06	61984.6	963875	112711	97888.2	102854
L-Leucyl-L-Alanine	LC	201.124	262.878		amino acid	1.76209e+06	1.98458e+06	1.12627	0.53102	2.13897e+06	2.04258e+06	1.59053e+06	1.63659e+06	1.58186e+06	1.58199e+06	2.99395e+06	2.42156e+06	1.98328e+06	2.42813e+06	985094	1.09544e+06
Alanyl-DL-Leucine	LC	203.139	312.047		amino acid	3.29933e+06	3.15298e+06	0.955644	0.53389	3.4189e+06	3.64154e+06	3.02379e+06	2.85478e+06	2.86861e+06	3.98833e+06	3.64897e+06	3.37015e+06	2.89935e+06	3.13838e+06	3.04435e+06	2.81669e+06
Embelin	LC	293.179	881.547	C10342	others	8.00073e+06	7.71012e+06	0.963677	0.53679	7.69091e+06	8.6425e+06	7.11725e+06	7.81186e+06	7.53266e+06	9.20921e+06	6.82806e+06	8.1267e+06	7.29115e+06	8.90126e+06	7.01083e+06	8.10276e+06
Capsaicin	LC	306.207	852.273	C06866	others	1.68082e+08	7.49531e+07	0.445931	0.548086	1.0624e+07	5.77997e+07	9.04953e+08	8.30405e+06	1.685e+07	9.96338e+06	1.49621e+08	1.45887e+08	9.3703e+07	1.85622e+07	1.96513e+07	2.22938e+07
(-)-Quinate	LC	191.055	84.0124	C00296	organic acid	9.94559e+06	1.18781e+07	1.19431	0.561513	6.80156e+06	7.05356e+06	1.60666e+07	9.99185e+06	9.56848e+06	1.01915e+07	1.03997e+07	2.02056e+07	2.13646e+07	8.01031e+06	6.16883e+06	5.11979e+06
1,2-Dioleoyl PC	LC	786.601	893.748		others	1.20966e+08	1.60844e+08	1.32966	0.57896	3.89758e+07	3.96006e+07	5.00114e+07	2.41571e+08	1.45504e+08	2.10135e+08	5.83415e+07	3.62948e+07	3.9796e+07	3.33568e+08	3.4254e+08	1.54521e+08
5,6-Dihydrouracil	LC	112.984	531.007	C00429	others	1.80931e+08	1.69654e+08	0.937673	0.591432	1.85028e+08	1.82509e+08	1.93686e+08	1.72114e+08	1.75769e+08	1.7648e+08	1.54094e+08	7.92201e+07	1.98125e+08	2.04087e+08	1.7174e+08	2.10658e+08
Oleamide	LC	282.279	869.616	C19670	others	1.47635e+08	1.74625e+08	1.18282	0.607892	3.31618e+08	9.07204e+07	7.4693e+07	1.66672e+08	7.38846e+07	1.48219e+08	2.07497e+08	1.20473e+08	2.0079e+08	1.098e+08	3.02031e+08	1.07159e+08
NMN	LC	335.064	102.956	C00455	nucleotides	1.10158e+07	1.27887e+07	1.16094	0.640691	4.0835e+06	3.00378e+06	1.0254e+07	1.46038e+07	1.77676e+07	1.6382e+07	6.36554e+06	7.33961e+06	9.94885e+06	2.37734e+07	1.41875e+07	1.51174e+07
PG(16:0/0:0)[U]	LC	483.272	867.259		others	4.36795e+07	4.9121e+07	1.12458	0.642395	3.2334e+07	3.87136e+07	3.22924e+07	4.9564e+07	5.00659e+07	5.91073e+07	4.30096e+07	5.41949e+07	9.28082e+07	5.61257e+07	2.07438e+07	2.78438e+07
Quercetin 3-Beta-D-Glucoside	LC	463.088	524.925	C05623	others	1.40016e+06	1.50132e+06	1.07225	0.667165	1.60265e+06	1.36129e+06	1.29453e+06	1.21593e+06	1.54024e+06	1.38632e+06	2.06623e+06	1.76273e+06	1.55892e+06	1.93952e+06	840517	840017
3-Ketosphinganine	LC	300.29	798.598	C02934	others	1.92567e+06	2.41171e+06	1.2524	0.688614	1.99327e+06	1.28541e+06	1.30598e+06	3.98699e+06	1.5056e+06	1.47677e+06	1.17251e+06	1.10258e+06	953547	1.78303e+06	1.59133e+06	7.86724e+06
Hexadecanoic acid	GC	117	1138.71	C00249	fatty acid	18.5718	17.8549	0.961398	0.698403	18.2382	14.0132	16.8475	21.7273	17.0918	23.5126	18.6773	19.0049	15.7384	22.2812	16.5101	14.9172
4-Hydroxybenzoic Acid	LC	137.023	383.086	C00156	organic acid	4.05039e+06	3.67178e+06	0.906524	0.713043	2.57599e+06	2.54914e+06	8.64252e+06	3.10222e+06	3.54394e+06	3.88855e+06	5.18168e+06	3.2488e+06	2.83196e+06	3.32591e+06	3.87696e+06	3.56536e+06
12-Oxo-2,3-Dinor-10,15-Phytodienoic Acid	LC	263.165	890.486		organic acid	741797	755721	1.01877	0.724302	834110	840353	660532	711137	709139	695512	750766	725886	713059	722349	760094	862170
Phosphocholine	LC	184.074	90.5341	C00588	phosphoric acid	2.30417e+07	2.45411e+07	1.06507	0.728141	1.33621e+07	1.23676e+07	1.61496e+07	2.97975e+07	3.20961e+07	3.44774e+07	2.25975e+07	2.61444e+07	2.69329e+07	2.32854e+07	2.3837e+07	2.44495e+07
Subaphyllin	LC	265.155	420.712	C10497	others	4.39933e+06	3.35847e+06	0.763404	0.738601	1.05383e+06	1.35219e+06	1.67677e+07	2.36343e+06	2.49871e+06	2.36015e+06	2.40318e+06	1.17875e+07	3.34716e+06	1.1688e+06	819341	624780
Glycine Betaine	LC	118.087	94.2796	C00719	others	8.00815e+07	8.66363e+07	1.08185	0.764565	2.55027e+07	2.77821e+07	4.9978e+07	1.40236e+08	1.1793e+08	1.1906e+08	8.35344e+07	8.28747e+07	9.31742e+07	1.01809e+08	7.70941e+07	8.13314e+07
Nonivamide	LC	294.207	847.122	D08282	others	7.70498e+06	9.58359e+06	1.24382	0.79931	1.1478e+06	1.99823e+06	3.87498e+07	1.34949e+06	1.83698e+06	1.14754e+06	2.51396e+07	1.19301e+07	1.22556e+07	2.50383e+06	2.85291e+06	2.81949e+06
Dihydrocapsaicin	LC	306.207	881.271	C16952	others	1.66786e+06	1.31878e+06	0.790699	0.816981	104991	620832	8.72781e+06	125389	257114	171025	2.81559e+06	1.87594e+06	1.73133e+06	581550	466447	441799
Citric Acid	LC	191.019	74.7199	C00158	organic acid	4.98707e+08	5.1472e+08	1.03211	0.821459	3.96974e+08	2.98406e+08	3.86239e+08	6.32099e+08	5.84209e+08	6.94316e+08	4.66374e+08	4.5991e+08	5.18471e+08	6.15699e+08	5.39058e+08	4.88806e+08
Asp-Phe	LC	281.114	416.867		amino acid	3.74781e+06	3.95999e+06	1.05661	0.822451	3.8503e+06	3.28074e+06	3.26089e+06	4.00901e+06	3.98707e+06	4.09885e+06	6.92313e+06	5.40195e+06	4.94367e+06	3.62741e+06	1.3433e+06	1.5205e+06
Lanceolatin B	LC	263.074	93.4427		others	1.25348e+07	1.29376e+07	1.03213	0.883097	6.94392e+06	6.37651e+06	7.37966e+06	1.79021e+07	1.82668e+07	1.83395e+07	1.15095e+07	1.15035e+07	1.09454e+07	1.5912e+07	1.24438e+07	1.53112e+07
6-Hydroxy Buspirone	LC	402.246	696.279		others	1.51288e+06	1.71354e+06	1.13263	0.884798	1.84226e+06	691650	779973	367019	4.99338e+06	403031	1.33886e+06	8283.17	120625	1.31826e+06	234689	7.26054e+06
Dodecanedioic Acid	LC	229.144	506.333	C02678	fatty acid	4.26067e+06	4.14495e+06	0.97284	0.89432	3.99314e+06	3.50908e+06	3.31636e+06	5.22355e+06	4.48515e+06	5.03674e+06	6.02431e+06	5.14879e+06	4.52675e+06	5.67244e+06	1.63206e+06	1.86533e+06
Cumanin	LC	265.148	824.499		others	9.82137e+06	9.72565e+06	0.990254	0.895588	8.90546e+06	1.00964e+07	8.35619e+06	9.00141e+06	9.84718e+06	1.27216e+07	9.16397e+06	1.00522e+07	9.1123e+06	9.83291e+06	9.11151e+06	1.1081e+07
Alanyl-DL-Phenylalanine	LC	237.124	412.739		amino acid	3.33005e+06	3.37738e+06	1.01421	0.900936	3.9862e+06	4.36627e+06	3.1131e+06	2.70664e+06	2.85403e+06	2.95405e+06	3.71855e+06	3.59772e+06	3.18835e+06	4.22432e+06	2.49066e+06	3.04467e+06
Glycerol-3-phosphate	GC	299.068	982.417	C00093	phosphoric acid	5.67236	5.52431	0.973901	0.901524	2.80376	3.90928	4.54219	7.33343	7.19002	8.25546	8.18938	7.38753	4.51679	5.00197	4.26468	3.78552
Confertifoline	LC	233.154	111.921	C09376	others	4.07115e+06	4.11725e+06	1.01132	0.93163	3.94911e+06	3.58717e+06	3.86622e+06	5.16461e+06	3.97028e+06	3.8895e+06	3.06406e+06	3.2304e+06	3.28282e+06	5.28428e+06	5.77575e+06	4.06619e+06
Glutamic acid	GC	246.1	881.652	C00025		410.67	407.264	0.991706	0.936626	400.307	400.419	359.671	390.944	408.855	503.825	342.381	334.137	326.762	555.453	443.068	441.785
(S)-Lactic Acid	LC	89.0232	236.922	C00186		7.81216e+06	7.91106e+06	1.01266	0.95019	4.40419e+06	6.395e+06	7.31108e+06	1.32667e+07	9.79256e+06	5.70342e+06	1.09398e+07	6.56856e+06	9.76961e+06	7.28087e+06	6.92373e+06	5.98374e+06
Imidiocarb	LC	349.184	441.032		others	4.81364e+06	4.79041e+06	0.995173	0.972812	4.24417e+06	3.89849e+06	3.91278e+06	4.54464e+06	7.64216e+06	4.63961e+06	4.29143e+06	4.7925e+06	5.01536e+06	6.14052e+06	3.75861e+06	4.744e+06
Salicylic Acid	LC	137.023	101.307	C00805	organic acid	3.71392e+06	3.70247e+06	1	0.986422	4.40488e+06	1.54956e+06	2.15999e+06	4.51039e+06	4.32577e+06	5.33295e+06	3.19832e+06	3.841e+06	4.80805e+06	3.44798e+06	3.6035e+06	3.31598e+06
1 Fold change=WL Hookeri/Cultivated Chinese chives

## Sheet: Table S2
Table S2. Sequencing data of RNA-seq
BMK-ID	Read Number	Base Number	%≥Q30
Tuberosum-1	21101857	6299586086	0.9319
Tuberosum-2	21031239	6292471148	0.9257
Tuberosum-3	21421655	6408004342	0.9325
WL Hookeri-1	21231640	6359032226	0.9349
WL Hookeri-2	25123118	7509099676	0.9334
WL Hookeri-3	23663933	7073088216	0.933

## Sheet: Table S3
Table S3. Full-length gene sequences obtained from sanger sequencing of PCR amplicons.
>AtGGT1	ATGGCGTCCACTCATGATCAACGCCTGGAATCATCGCTCCTGCCCCGTGAAAAGTCCTCCGACCATCCTTCTGTCGTGCGTCGGATTCTGATGGTCTTTGTTGTCACGGCTTTCTTCACAGTTTTAGGACTCCATTTCTCATCCGTCCAACTCCAATATCGCAATTCTGAAGAAATAAGGAGATCGAGAAAAGGACTAGAAAGCACAGGTGGCAGCGATGCAGTTGAATCAGAGAAGGGAGTGGTCGCGGCAGATGACGGATACTGTTCTGAAATCGGAGCTTCGGTGCTGAGAAAAGGAGGGCATGCTGTGGATGCTGTAGTGGCGACAGCAATATGCGAAGGCGTTAGACATCCAATGTCGAGCGGAATTGGTGGTGGTGCGTTCATGGTCGTCAGA…
>AtGGT1	MASTHDQRLESSLLPREKSSDHPSVVRRILMVFVVTAFFTVLGLHFSSVQLQYRNSEEIRRSRKGLESTGGSDAVESEKGVVAADDGYCSEIGASVLRKGGHAVDAVVATAICEGVRHPMSSGIGGGAFMVVRSAKDGKALAFDARETAPSAASKDMYKNNPLAKSLGPLSMGIPGEIAGLHAAWSLYGKFPWQSLFEPSIELLRNGFKIEPYLALSINDNKDKILSDPGLAEVFAPNGKLLQLNDTLHNFKLANSLEAIAEEGPQAFYNGSVGQKFVQDIRNLGGIVTMNDMRNYRVEVTEPLFSNVLGYTIVGMPLPSSGTLGVSMVLNILRSYKTLDAMKGFLGLHRQIEAVKHTLAIRMNLGDPKFVNCTKYVDDMLSPTYAEQVKERIFDNTTF…
>AhGGT1-WL	AATTGGTGCCCCTCATCAGCCGCGGGACTCTATTTCTCATCAATCCAGCATCGCAATTCTGAAGAACATGGGACATTGGCAAAAGGGTTAGAAAGCACAGGCGGCAGCGATGAAGTTGAATCAGAGAACGGAGTCGTGGCAGCAGATGACGGATACTGTTCTGAAATCGGAGCTTCAGTACTGAGAAAAGGAGGACATGCCGTAGATGCCGTAGTGGCGACAGCAATATGTGAAGGCGTTAGACATCCAATGTCCAGCGGAATTGGCGGTGGTGCGTTCATGGTCGTTAGATCTGCGAAAGACGGGAAAGCTTTAGCTTTTAATGCCAGAGAAACTGCACCATTAGCTGCTTCTAAGGACATGTTTCAAAATAATCCATTAGCTAAGTCATTGGGACCA…
>AhGGT1-WL	NWCPSSAAGLYFSSIQHRNSEEHGTLAKGLESTGGSDEVESENGVVAADDGYCSEIGASVLRKGGHAVDAVVATAICEGVRHPMSSGIGGGAFMVVRSAKDGKALAFNARETAPLAASKDMFQNNPLAKSLGPLSMGIPGEIAGLHAAWLLYGKLPWNLLFEPSIKLLRNGVKIEPYLALSINENKDKIISDPGLSEVFAPNGKLLQLNDTFHNLKLANALEAIAEEGPQAFYNGSVGQKFVQDIRNLGGIVTMDDMRTYRVEVTDALFSNVLGYTIVGMPPPSSGTVGVSMVLNILGSYRTLDAMKGLLGLHRLIEAVKHTLAIRMNLGDPKFVNCTKYVDDMLSPTYAEQVKERISDHTTFDPSYYLNRWSQVRDHGTSHVSIVDSERNAVAFTSTV…
>AhGGT1-EWL	AATTGGTGCCCCTCATCAGCCGCGGGACTCTATTTCTCATCAATCCAGCATCGCAATTCTGAAGAACATGGGACATTGGCAAAAGGGTTAGAAAGCACAGGCGGCAGCGATGAAGTTGAATCAGAGAACGGAGTCGTGGCAGCAGATGACGGATACTGTTCTGAAATCGGAGCTTCAGTACTGAGAAAAGGAGGACATGCCGTAGATGCCGTAGTGGCGACAGCAATATGTGAAGGCGTTAGACATCCAATGTCCAGCGGAATTGGCGGTGGTGCGTTCATGGTCGTTAGATCTGCGAAAGACGGGAAAGCTTTAGCTTTTGATGCCAGAGAAACTGCACCATTAGCTGCTTCTAAGGACATGTTTCAAAATAATCCATTAGCCAAGTCATTGGGACCA…
>AhGGT1-EWL	NWCPSSAAGLYFSSIQHRNSEEHGTLAKGLESTGGSDEVESENGVVAADDGYCSEIGASVLRKGGHAVDAVVATAICEGVRHPMSSGIGGGAFMVVRSAKDGKALAFDARETAPLAASKDMFQNNPLAKSLGPLSMGIPGEIAGLHAAWLLYGKLPWNLLFEPSIKLLRNGVKIEPYLALSINENKDKIISDPGLSEVFAPNGKLLQLNDTFHNLKLANSLEAIAEEGPQAFYNGSVGQKFVQDIRNLGGIVTMDDMRTYRVEVTDALFSNVLGYTIVGMPPPSSGTVGVSMVLNILGSYRTLDAMKGLLGLHRLIEAVKHTLAIRMNLGDPKFVNCTKYVDDMLSPTYAEQVKERISDHTTFDPSYYLNRWSQVRDHGTSHVSIVDSERNAVAFTSTV…
>AtGGT2	ATGGAACCGGCGCATGATGACCTGAAATCTTCGCTTCTGCGCTATCGTGCGCTGCACAAAGATGGTGCTATTGTGCGCCGGTTTCCGATCTTATTTATTGTTGGAGCTTTTATCATTTTTGGGCTTCTCTTCTCAATCCAGTCCAACTCAGATGATTTCAGAGGAGTTGATGAGCTCAAAAGCATAAGTGGTGGTGAAGTAGTTGAATCAGAGGTAGGGGTGGTTGCCGCAGACGATGGATATTGCTCTGAGACTGGAGCTTCAATATTGAGAAAAGGGGGTCATGCTGTTGATGCTTTAGTTGCAACAGCTATATGTGAAGGCATAAGACATCCAATGTCCAGTGGAATTGGGGGAGGAGCATTTATTGTGGTTAGATCAGCGAAAGATGGGAAAGCT…
>AtGGT2	MEPAHDDLKSSLLRYRALHKDGAIVRRFPILFIVGAFIIFGLLFSIQSNSDDFRGVDELKSISGGEVVESEVGVVAADDGYCSETGASILRKGGHAVDALVATAICEGIRHPMSSGIGGGAFIVVRSAKDGKALAFDARETAPIAASRDMYQSNPLAKSLGPLSMGIPGEIAGLHAIWLMYGKLPWKSLFQPSIELLRNGFKIVPYLDLSIREHADKIMSDPGLREVFAPNGKLLKLNDTLYNHKLVNSLEKIAREGPQAFYNGSIGEKFVQDIRDLGGIVTMDDMRNYRVEVTEALSSNALGYTIIGMPPPSTGTVGISMVLNILGSYKTLDAAKGLIGLHRLIEAVKHTLGMRMNLGDPNFVNVTEYVNDMLSPTFAEKVKERIFDNTTFDLSYYSN…
>AhGGT2-WL	ATGGAACCGGCGCATGATGACCTGGAATCTTCACTTCTGCGCTATCGTGCGCTGTATAAGGATCGTGCTATTGTGCGCCGGGTTCCGTTTGTATTCATTGTCGCAGCTTTTATTGTTTTTGGGCTTCTATTCTCAATCCAATTCAACTCAGTTGATTTCAAAGGAATTGATGAGCTCAAAAGCATAGGTGGTGGTGAAGTTGTTGAATCAGAGGAAGGAGTGGTTGCTGCAGATGATGGATATTGCTCTGAAACTGGAGCTTCAATATTAAGAAAAGGGGGTCATGCTGTGGATGCTTTAGTTGCAACTGCAATATGTGAAGGCATAAGACATCCAATGTCGAGCGGAATCGGGGGAGGAGCATTTATTGTGGTTAGATCAGCAAAAGATGGGAAAGCT…
>AhGGT2-WL	MEPAHDDLESSLLRYRALYKDRAIVRRVPFVFIVAAFIVFGLLFSIQFNSVDFKGIDELKSIGGGEVVESEEGVVAADDGYCSETGASILRKGGHAVDALVATAICEGIRHPMSSGIGGGAFIVVRSAKDGKAFAFDARETAPVAASRDMYQNNTEAKCLGSLSVGIPGEIAGLHAIWLLYGKLPWKSLFQPSIELLRKGFKVVPYLDLSIREHADLILTDPGLREVFAPNGKLLKLNDTLYNHKLADSLETIAREGPQALYNGSIGEKFVQDVRDLGGIVTMNDMRNYRVEVTEALSGNALGFTILGMPPPSTGTVGISMVLNILGSYKTLDAVKGLIGLHRLIEAVKHTLGMRMNLGDPNFVNNSEYVNDMLSPTYAEKVKERIFDNTTFDLSYYNN…
>AhGGT2-EWL	ATGGAACCGGCGCATGATGACCTGGAATCTTCACTTCTGCGCTATCGTGCGCTGTATAAGGATCGTGCTATTGTGCGCCGGGTTCCGTCTGTATTCATTGTCGCAGCTTTTATTGTTTTTGGGCTTCTATTCTCAATCCAATTCAACTCAGTTGATTTCAAAGGAATTGATGAGCTCAAAAGCATAGGTGGTGGTGAAGTTGTTGAATCAGAGGAAGGAGTGGTGGCTGCAGATGATGGATATTGCTCTGAAACTGGAGCTTCAATATTAAGAAAAGGGGGCCATGCTGTGGATGCTTTAGTTGCAACTGCAATATGTGAAGGCATAAGACATCCAATGTCGAGCGGAATCGGGGGAGGAGCATTTATTGTGGTTAGATCAGCAAAAGATGGGAAAGCT…
>AhGGT2-EWL	MEPAHDDLESSLLRYRALYKDRAIVRRVPSVFIVAAFIVFGLLFSIQFNSVDFKGIDELKSIGGGEVVESEEGVVAADDGYCSETGASILRKGGHAVDALVATAICEGIRHPMSSGIGGGAFIVVRSAKDGKAFAFDARETAPIAASRDMYQNNTEAKCLGSLSVGIPGEIAGLHAIWLLYGKLPWKSLFQPSIELLRKGFKVVPYLDLSIREHADLILTDPGLREVFAPNGKLLKLNDTLYNHKLADSLETIAREGPQALYNGSIGEKFVQDVRDLGGIVTMDDMRNYRVEVTEALSGNALGFTILGMPPPSTGTVGISMVLNILGSYKTLDAVKGLIGLHRLIEAVKHTLGMRMNLGDPNFVNNSEYVNDMLSPTYAEKVKERIFDNTTFDLSYYNN…
>AtGGT3	ATGCCTGCTTATATGGCCAAATGGCTAGCAGTAACATTGCTCCTACTAGTATTCTACAAACCCATTTTGGCTGCGGGCGCCATAAAACATAGGAGAGAGGTGATTACATCGGAGAACGGCGCAGTTGCTAGCGATGATGGTCGATGTTCGGTGATTGGAAAAGACATCCTTAAAGAAGGCGGGAACGCAGTTGATGCTGCGGTTGCAACTTCATTTTGTTTGGGAGTGGTTAGCGCGGCGTCTAGTGGTATCGGTGGAGGCGCTTTTATGTTGATCAGGATGGCTGATGGTCAGGCCTACGCATTTGATATGAGAGAGACTGCACCATTGCGTGCATCACAGAATATGTACAATGGAAATGCTCTACTAAAAGGCAGCGGCATTCTATCAGTTGCAGTA…
>AtGGT3	MPAYMAKWLAVTLLLLVFYKPILAAGAIKHRREVITSENGAVASDDGRCSVIGKDILKEGGNAVDAAVATSFCLGVVSAASSGIGGGAFMLIRMADGQAYAFDMRETAPLRASQNMYNGNALLKGSGILSVAVPGEIAGLHRAWKQHGKLPWKRLVMPAAKIAKAGFKISKYLHMQMSKTKSEILKDKGMQEIYTSNGTLLKAGDICRNNKLALTLREIAVHGPKVFYNGSVGTNLVNDIQKLGGILTLNDLRRYRVKVSKPISAHVMGYEILGMPPPSSGGAGMILILNILAQYGIPSGVSGSLGLHRFIESLKHMMAIRMNLGDPAFVNVSEVLSEMLSLRFAEDLKKKIYDNMTFDPSYYGPKWNTMNDHGTSHLSIVDSERNSVSMTSTVNSYFG…
>AhGGT3-WL	ATGAAGGCCTGTGCTGCCTTCACTCCCTTCCGTCAAGATTCACTACTGCAACACCACTCAATTATTGAAAGTCTACTATTATACCCATCATTCTCCATGCTCTTTTTACAAGCACTAATAAATCAATTCCAAAATGCAGCTTACATACCCAAATGGCTAGCAGTAACATTAATACTATTAGTTTTCTACAAACCAATTTTGGCCACTGTTGCAATACAACATAGAAGGGAGGTGATCACATCAAAGAATGGCGCAGTTGCTAGCGATTATGGCCGATGTTCGGTCATAGGAAAAGATGTTCTTAAAGAAGGTGGAAACGCGATTGATGCTGCTGTTGCATCTTCGTTTTGTTTAGGGGTTGTTAGTGCAGCGTCTAGTGGTATTGGTGGAGGCGCTTTT…
>AhGGT3-WL	MKACAAFTPFRQDSLLQHHSIIESLLLYPSFSMLFLQALINQFQNAAYIPKWLAVTLILLVFYKPILATVAIQHRREVITSKNGAVASDYGRCSVIGKDVLKEGGNAIDAAVASSFCLGVVSAASSGIGGGAFMIIRMADGKAYAFDMRETAPLRASKNMYNGNALLKGSGILSVAVPGEIAGLHRAWKQHGKLPWKRLVMPAAKIAKTGFKISKYLYMQMNRTKSDILKDKGMREIYTSNGTLLMLGDICRNKKLAQTLHKIAVHGPNVFYNGSVGINLIRDIQKLGGILTMNDLRGYRVKVSKPISANVMGYEILGMPPPSSGGAGMILILNILAQYGIPSGVSGSLGLHRFIESLKHMMAIRMNLGDPAFVDVSEVVAEMLSPKFAEDLKKKIYDN…
>AhGGT3-EWL	ATGAAGGCCTGTGCTGCCTTCACTCCCTTCCGTCAAGATTCACTACTGCAACACCACTCAATTATTGAAAGTCTACTATTATACCCATCATTCTCCATGCTCTTTTTACAAGCACTAATAAATCAATTCCAAAATGCAGCTTACATACCCAAATGGCTAGCAGTAACATTAATACTATTAGTTTTCTACAAACCAATTTTGGCCACTGTTGCAATACAACATAGAAGGGAGGTGATCACATCAAAGAATGGCGCAGTTGCTAGCGATTATGGCCGATGTTCAGTCATAGGAAAAGATGTTCTTAAAGAAGGTGGAAACGCGATTGATGCTGCTGTTGCATCTTCGTTTTGTTTAGGGGTTGTTAGTGCAGCGTCTAGTGGTATTGGTGGAGGCGCTTTT…
>AhGGT3-EWL	MKACAAFTPFRQDSLLQHHSIIESLLLYPSFSMLFLQALINQFQNAAYIPKWLAVTLILLVFYKPILATVAIQHRREVITSKNGAVASDYGRCSVIGKDVLKEGGNAIDAAVASSFCLGVVSAASSGIGGGAFMIIRMADGKAYAFDMRETAPLRASKNMYNGNALLKGSGILSVAVPGEIAGLHRAWKQHGKLPWKRLVMPAAKIAKTGFKISKYLYMQMNRTKSDILKDKGMREIYTSNGTLLMLGDICRNKKLAQTLHKIAVHGPNVFYNGSVGINLIRDIQKLGGILTMNDLRGYRVKVSKPISANVMGYEILGMPPPSSGGAGMILILNILAQYGIPSGVSGSLGLHRFIESLKHMMAIRMNLGDPAFVDVSEVVSEMLSPKFAEDLKKKIYDN…
>AtPCS1	ATGGCGCTGGCGGGACTTTTTCGTCGAGTTCTCCCTTCACCGCCGGCCATCGAGTTTGCCTCGACCGAGGGAAAGAAACTTTTCTCTGAAGCTCTACAAAATGGAACAATGGAAGGATTTTTTAAGTTAATTTCCTACTTCCAGACACAATCTGAACCTGCTTATTGTGGTCTGGCTAGTCTGTCTATGGTGTTAAATGCCCTTGCAATTGATCCAGGAAGAAAGTGGAAAGGACCTTGGAGATGGTTCGACGAATCAATGCTAGATTGTTGTGAACCTTTGGAAAAAATCAAAGCAGAAGGAATCACATTTGGGAAAGTTGCATGCCTGGCTCATTGTGCTGGTGCTAATGTTCAAGCTATTCGTACAAGCCAAGGCACTCTTGAGGATTTCCGTAAG…
>AtPCS1	MALAGLFRRVLPSPPAIEFASTEGKKLFSEALQNGTMEGFFKLISYFQTQSEPAYCGLASLSMVLNALAIDPGRKWKGPWRWFDESMLDCCEPLEKIKAEGITFGKVACLAHCAGANVQAIRTSQGTLEDFRKHVIRCTSSDDCHVITSYNRKAFGQTGTGHFSPIGGYHKGSDMALILDTARFKYPPHWVPLPLLWEAMKYEDPATGYPRGFMLISKLQRAPSLLYTLSCRHESWVHTAKYLIDDVPILLKKANLNTVQDVLSLIFKSLLSNAGDFIKWVAEVRRQEENPALSKEEKERLAIKEIVLRQIRETKLYEYVLEWLSDMRSCCCNASAFGGNDSLTDIAANVCCQGALMLAGNLGGNSKSCLKATCVNNLKSNGGEPITVVSGTVVSESGE…
>AhPCS1-WL	ATGGCGCTTGCGGGACTTTATCGTCGAGTTCTCCCATCACCGCCGGCGATAGAGTTTGCCTCAACTGAGGGAAAGAAACTATTCTCTGAAGCTCTACAAAATGGAACAATGGAAGGATTTTTTAAATTAATTTCCTACTTCCAGACACAATCTGAACCTGCTTACTGTGGTCTGGCTAGTCTATCTATGGTGTTAAATGCCCTCGCCATTGATCCAGGAAGAAAGTGGAAAGGCCCATGGAGATGGTTCGATGAGTCAATGTTAGATTGTTGCGAACCTTTGGAAAAAGTCAAAGCAGATGGAATCACATTTGGAAAAGTTGCATGCTTGGCTCATTGCGCCGGTGCTAATGTGCAAGCTATTCGTACAAGCCAAGGCACTCTTGAGGATTTCCGTAAG…
>AhPCS1-WL	MALAGLYRRVLPSPPAIEFASTEGKKLFSEALQNGTMEGFFKLISYFQTQSEPAYCGLASLSMVLNALAIDPGRKWKGPWRWFDESMLDCCEPLEKVKADGITFGKVACLAHCAGANVQAIRTSQGTLEDFRKHVIKCTSSDDCHVITSYNRKAFSQTGTGHFSPIGGYHEGSDMALILDTARFKYPPHWVPLPLLWDAMKYEDPATGYPRGFMLISKLQRAPSLLYTLSCRHESWVHTAKYLIDDVPILLKEATLNTVQDVLSLIFKPLLSDAGDFIKWVAEVRRQEENSALSKEEKERLAIKEIVLHQIRETKLFKYVSEWLSDIRSCCCNASAFNRKDSLTDIAANVCCQGALMLAGNLFGSSKSCLKATCVNEVQSNGGGSITVVSGTVVSEGGE…
>AhPCS1-EWL	ATGGCGCTTGCGGGACTTTATCGTCGAGTTCTCCCATCACCGCCGGCGATAGAGTTTGCCTCGACTGAGGGGAAGAAACTATTCTCTGAAGCTCTACAAAATGGAACAATGGAAGGATTTTTTAAATTAATTTCCTACTTCCAGACACAATCTGAACCTGCTTACTGTGGTCTGGCTAGTCTATCTATGGTGTTAAATGCCCTCGCAATTGATCCAGGAAGAAAGTGGAAAGGCCCGTGGAGATGGTTCGATGAGTCAATGTTAGATTGTTGCGAACCTTTGGAAAAAGTCAAAGCAGATGGAATCACATTTGGAAAAGTTGCATGCTTGGCTCATTGCGCCGGTGCTAATGTTCAAGCTATTCGTACAAGCCAAGGCACTCTTGAGGATTTCCGTAAG…
>AhPCS1-EWL	MALAGLYRRVLPSPPAIEFASTEGKKLFSEALQNGTMEGFFKLISYFQTQSEPAYCGLASLSMVLNALAIDPGRKWKGPWRWFDESMLDCCEPLEKVKADGITFGKVACLAHCAGANVQAIRTSQGTLEDFRKHVIKCTSSDDCHVITSYNRKAFSQTGTGHFSPIGGYHEGSDMALILDTARFKYPPHWVPLPLLWDAMKYEDPATGYPRGFMLISKLQRAPSLLYTLSCRHESWVHTAKYLIDDVPILLKEATLNTVQDVLSLIFKPLLSDAGDFIKWVAEVRRQEENSALSKEEKERLAIKEIVLHQIRETELFKYVSEWLSDIRSCCCNASAFNREDSLTDIAANVCCQGALMLAGNLFGSRKSCLKATCVNKVQSNGGGSITVVSGTVVSEGGE…
>AtFMO1	ATGTTTTCCTCGTCCTTTTTGTCCATCCACAAAATGCCCACTACCCTTGTCCCACTCATCGCCAGCCACGTAGCAATCATTGGCGCCGGCGCTGCGGGTCTCGTCGCTGCCCGCGAGCTCCGCCGGGAAGGCCATACCGCCACCGTCTTCGAACGCGGATCCTCAATCGGCGGAACATGGATATACACGCCAGCTACAGAACCCGACCCGATAGGCCAGGATCCGGCCCGGCCTATAGTACACTCCAGTTTGTATAAGTCTTTACGAACGAACCTGCCGCGCGAAGTGATGGGGTTTCTCGATTTTCCTTTCGTGGAGAAAGCGGACGGCGGAGATCGGAGGAGGTTTCCAGGGCACGAAGAGGTGCTAGATTATTTGGAGAGGTTCGGTAGGGAGTTT…
>AtFMO1	MFSSSFLSIHKMPTTLVPLIASHVAIIGAGAAGLVAARELRREGHTATVFERGSSIGGTWIYTPATEPDPIGQDPARPIVHSSLYKSLRTNLPREVMGFLDFPFVEKADGGDRRRFPGHEEVLDYLERFGREFGVAREVGMEKEVVSVEMEESGKWTVGWRGKDGGGGMEGFDAVVVCNGHYTEPRLAEIPGIDVWPGKQMHSHNYRIPEPFDDQVVVIIGSSASAVDISRDVARFAREVHIANRSITEGTPAKQPGYDNMWLHSMIQSTHDDGSVVFQDGWSVHVDVIMHCTGYVYHFPFLNTNGIVTVDDNRVGPLYKHVFPPLLAPSLSFVGIPWKVVPFPLCELQSKWIAAVLSGRISLPTQKEMMEDVEAYYKQMELAGIPKRYTHNIGHNQFD…
>AhFMO1-WL	ATGATATCCACTTCTTCATCTTATCCATCCATCCCCAAAATGCCCATTACCCCTCTCCCACTCATCACCCGTAACGTAGCAGTCATCGGCGCTGGCGCCGCGGGTCTTGTCACTGCCCGCGAGCTCCGCCGAGAAGGTCACGCCGCGACTGTTTTCGAACGGGGTGCCTCAATTGGCGGAACATGGATTTACACGCCCGCTACAGAGCCCGACCTGTTAGGCAAGGATCCAGCCCGGCCTATAGTTCATTCCAGCCTGTACAAGTCGCTGCGCACGAACCTGCCGCGTGAAACGATGGGGTTTCTCGATTTTCCATTTGTCGAGAGAACGGAAGGCGCAGATCGGAGGAGGTTTCCGGGACACGAGGAGGTATTGGATTATTTGGAGAGGTTCGGGAAG…
>AhFMO1-WL	MISTSSSYPSIPKMPITPLPLITRNVAVIGAGAAGLVTARELRREGHAATVFERGASIGGTWIYTPATEPDLLGKDPARPIVHSSLYKSLRTNLPRETMGFLDFPFVERTEGADRRRFPGHEEVLDYLERFGKEFGVAGEVGMGKEVVTVNMEEGGKWTVGWIGKDGGGGEDGFDAVIVCNGHYTEPRIAEIPGIDVWPGKQMHSHNYRIPEPFHDQVVVIIGSSASAVDISRDVARFAKEVHIANRSMTEGTPAKQPGYDNMWLHSMIKSTQADGSVVFQDGWSVHVDVIMHCTGYIYHFPFLNTNEIVSVDDNRVGPLYKHVFPPLLAPSLSFVGIPWKVVPFPLCELQSKWIAAVLSGRTSLPTQEEMMKDVEAYYKQMELAGIPKRYTHNIGHTQ…
>AhFMO1-EWL	ATGATGTCCACTTCCTCATCTTATCCATCCATCCCCAAAATGCCCATTACCCCTCTCCCACTCATCACCCGTAACGTAGCAGTCATCGGCGCTGGCGCCGCGGGTCTTGTCACTGCCCGCGAGCTCCGCCGAGAAGGTCACGCCGCGACTGTTTTCGAACGGGGTGCCTCAATTGGCGGAACATGGATTTACACGCCCGCTACAGAGCCCGACCTGTTAGGCAAGGATCCAGCCCGGCCTATAGTTCATTCCAGCCTGTACAAGTCGCTGCGCACGAACCTGCCGCGTGAAACGATGGGGTTTCTCGATTTTCCATTTGTCGAGAGAACGGAAGGCGCAGATCGAAGGAGGTTTCCGGGACACGAGGAAGTGTTGGATTATTTGGAGAGGTTTGGGAAG…
>AhFMO1-EWL	MMSTSSSYPSIPKMPITPLPLITRNVAVIGAGAAGLVTARELRREGHAATVFERGASIGGTWIYTPATEPDLLGKDPARPIVHSSLYKSLRTNLPRETMGFLDFPFVERTEGADRRRFPGHEEVLDYLERFGKEFGVAGEVGMGKEVVTVNMEEGGKWTVRWIGKDGGRGEDGFDAVIVCNGHYTKPRIAEIPGIDVWPGKQMHSHNYRIPEPFHDQVVVIIGSSASAVDISRDVARFAKEVHIANRSMTEGTPAKQPGYDNMWLHSMIKSSQADGSVVFQDGWSVHVDVIMHCTGLIITTGLQMNVEVAVSKSGEG
>AtALN	ATGGAAACATACAAACCAGGCAACAAAATGCCTTACCTGATAATATTACTCTGTGTTTCGTTCCCATTCTTTAACACTGTTCAAACACTAAGCTGGACCTTAAAGGCAGCAGAAGAGGCAGAGGCAGTGGCTGCTATCAAGTGCTCTGGTCATGGCCGAGCTTATCAGGATGGAGTTCTTTCTAAAGGTTCTCCAATATGTGAATGCAATACCTGCTACGAGGGTTCTGATTGCTCTACGAAGACCCCTAATTGCTCTGCTGATGTCGCCAGCGGAGATGCACTGTTCTTAGAGGAATACTGGAAGGACCACAAGGAAAATACAGCAGTGCTAGTTTCAGGATGGCACAGGATGAGCTACTTCTTCCCTGAAAAAGACAGCGACTTCATGTCAGCTGAA…
>AtALN	MTYKGNKMYCVSNTVTSWTKAAAAVAAKCSGHGRAYDGVSKGSCCNTCYGSDCSTKTNCSADVASGDAYWKDHKNTAVVSGWHRMSYKDSDMSAKRTTHVGNATKGKHVGVGVTHGVTSNSNCTAGAKVVARAYYAVRDTSYDNKGYWKGNAANYVNDNNVTSNNGNRKAMVGSTAYDMVYYWHTTYKADDMTMSKYTGHSGSRGWAKDNVAKVMSKNTGTSRTRTKVAMKTHKGTKDNGHRRWKVTDSNKRSYHNSHCNYMRMKRSSYAWVRCNWGNCSVKGGTDGRAGSYVRSKTNDDDMMDHKKMKKRTVKSGVDKGSRR
>AhALN-WL	ATGGAAACATACAAACCAGGCAACAAAATGCCTTACCTGATAATATTACTCTGTGTTTCGTTTCCATTCTTTAACACTGTTCAAACACTAAGCTGGACAGCAAAGGCAGCAGAAGAGGCAGAGGCAGTGGCTGCTATAGACTGTTCGGAGCATGGAAGAGCATTTCTGGATGGAATTATTTCCAATGGCTCTCCTAAATGCGAGTGTAATAATTGCTACACGGGGGATGATTGCTCTCAAAAGATTCAAGGTTGCTCTGCTGATGTTGCCAGTGGTGATGGACTATTTCTAGAGGAATACTGGAAGCAACACAAGGAGAACAGTGCAGTGCTAGTTTCAGGATGGCACAGAATGAGCTACTTTTTTAACCCAGTTAGCAATTTCATTTCTTTTGAGCTC…
>AhALN-WL	METYKPGNKMPYLIILLCVSFPFFNTVQTLSWTAKAAEEAEAVAAIDCSEHGRAFLDGIISNGSPKCECNNCYTGDDCSQKIQGCSADVASGDGLFLEEYWKQHKENSAVLVSGWHRMSYFFNPVSNFISFELEKTIKELHETVGNAAAKDKYIVFGVGVTQLIHGLVISLSPNMSATPCAPPAKVVAHAPYYPVFREQTKYFDKRGYEWKGNAANYVNTSTPEQFIEMVTTPNNPEGHLRLEVIKGCKSIYDMVYYWPHYTPIKYKADHDIMLYTMSKYTGHSGSRFGWALIKDETVYKNLLAYMVKNTEGTSRETQLRSLKVLKEVLAMIKTQKGTTRDINTFGFQKLRERWVAVTALLDKSNRFSYQKLNQSEYCNYFRRMRPPSPSYAWVKCEWE…
>AhALN-EWL	ATGGAAACATACAAACCAGGCAACAAAATGCCTTACCTGATAATATTACTCTGTGTTTCGTTTCCATTCTTTAACACTGTTCAAACACTAAGCTGGACAGCAAAGGAAGCAGAAGAGGCAGAGGCAGTGGCTGCTATAGACTGTTCGGAGCATGGAAGAGCATTTCTGGATGGAATTATTTCCAATGGCTCTCCTAAATGCGAGTGTAATAATTGCTACACGGGGGATGATTGCTCTCAAAAGATTCAAGGTTGCTCTGCTGATGTTGCCAGTGGTGATGGACTATTTCTAGAGGAATACTGGAAGCAACACAAGGAGAACAGTGCAGTGCTGGTTTCAGGATGGCACAGAATGAGCTACTTTTTTAACCCAGTTAGCAATTTCATTTCTTTTGAGCTC…
>AhALN-EWL	METYKPGNKMPYLIILLCVSFPFFNTVQTLSWTAKEAEEAEAVAAIDCSEHGRAFLDGIISNGSPKCECNNCYTGDDCSQKIQGCSADVASGDGLFLEEYWKQHKENSAVLVSGWHRMSYFFNPVSNFISFELEKTIKELHETVGNAAAKDKYIVFGVGVTQLIHGLVISLSPNMSATPCAPPAKVVAHAPYYPVFREQTKYFDKRGYEWKGNAANYVDTSTPEQFIEMVTTPNNPEGRLRLEVIKGCKSIYDMVYYWPHYTPIKYKADHDIMLYTMSKYTGHSGSRFGWALIKDETVYKNLLAYMVKNTEGTSRETQLRSLKVLKEVLAMIKTQKGTTRDINTFGFQKLRERWVAVTALLDKSNRFSYQKLNQSEYCNYFRRMRPPSPSYAWVKCEWE…
>AsActin1	TGACGGATTTCAGTTTGTTTTCTCGATTGTTAAAGTTCTGCTTCAGAAAATGGCTGATGGCGAGGATATTCAACCACTTGTCTGCGACAATGGTACTGGAATGGTTAAGGCTGGATTTGCCGGTGATGATGCACCAAGAGCAGTATTCCCAAGCATTGTCGGACGTCCTCGCCACACAGGAGTTATGGTTGGAATGGGACAAAAGGATGCTTACGTAGGCGATGAAGCACAATCCAAAAGGGGTATCCTTACCTTAAAGTACCCCATTGAGCATGGTATTGTCAGTAACTGGGACGACATGGAGAAGATTTGGCACCATACATTCTACAATGAGCTTCGTGTTGCTCCTGAAGAACATCCCGTGCTTCTAACGGAGGCTCCACTTAACCCCAAGGCTAA…
>AtActin2	ACCAGCAAATCCAGCCTTAACCATTCCAGTACCATTGTCACAAACAAGGGGTTGAATATCCTCACCATCAGCCATTTTCTAAAGGAACTCGGTGACTCTTTTATAATCGAGAAAACAAACTGAAATTCGTCACGGGATCGAATAGAATGGAAAAGCTAGAATGAGCAGCAGCAACTAGGGTTTTATATAAACTACCTTCGAGATTCTTTATGCTAGATTCCTTCCAACGAAATTTACGTTACCAAAAAGGACAGCATTAAAATTGGCGCTGA
>AhActin2	TAACAGAGAAAAGATGACCCAAATCATGTTTGAGACATTCAATGTGCCTGCTATGTATGTTGCCATCCAGGCCGTTCTGTCCCTCTACGCTAGTGGACGTACCACTGGTATCGTGCTGGATTCTGGTGATGGTGTGAGTCACACTGTTCCCATCTATGAGGGTTACGCCCTCCCTCATGCCATTCTCCGTTTGGACCTTGCTGGTCGTGACCTTACTGATGCTCTCATGAAAATTCTCACTGAAAGAGGTTACATGTTCACCACCACTGCCGAACGGGAAATTGTC
>AsEF-1α1	TCTTGCTTCTCCTTGTCGAATTAGCTTAACTCAACAACAATGGGAAAGGAAAAGGTTCACATCAACATTGTGGTCATTGGCCATGTGGACTCTGGAAAGTCTACCACCACTGGTCATTTGATATATAAACTAGGTGGCATCGACAAGCGTGTAATTGAAAGATTCGAAAAGGAAGCTGCTGAAATGAACAAAAGGTCCTTCAAGTATGCCTGGGTGCTTGACAAACTCAAGGCTGAGCGTGAAAGAGGTATTACCATTGATATTGCCTTGTGGAAGTTTGAGACCACCAAGTACTATTGCACAGTCATTGATGCTCCTGGACATCGTGACTTCATCAAGAACATGATTACTGGAACTTCTCAGGCTGATTGTGCTGTACTTATCATTGACTCCACCACT…
>AtEF-1α2	ACGCCGGTCTCGACACGACCAACCGGGACAGTACCAATGCCCCCAATCTTGTAGACATCCTGGAGTGGGAGACGGAGGGGCTTGTCAGAGGGACGTTTTGGCTCGTTGATCTGGTCCAGGGCTTCGAGGAGGGTAGGACCCTTGTACCAGTCCAGGTTGGTGGATCGTTCGATCATGTTGTCACCTTCGAAGCCAGAGATGGGGACGAAGGGCACCTTTTCAGGGTTGTAGCCTACCTTTTTGAGGTAGGATGAGACCTCCTTCACAATTTCTTCGTATCGGGCCTTTGAGTACTTGGGGGTTGTAGCATCCATCTTGTTACAGCAACAGATCATTTGCTTCACTCCAAGAGTGAAAGCAAGCAAAGCATGCTCACGGGTCTGACCATCCTTTGAAATA…
>AhEF-1α2	CGGCCGACAGGGACAGTGCCAATGCCTCCGATTTTGTAGACGTCCTGAAGAGGGAGGCGGAGAGGTTTGTCGGAGGGCCGTTTGGGCTCGTTGATTTGATCAAGGGCATCGAGAAGAGTGGGGCCCTTGTACCAGTCAAGGTTGGTGGAGCGCTCAATCATGTTGTCACCTTCAAAACCAGAGATGGGGACAAAGGGGACCTTTTCAGGGTTGTAGCCGACCTTTTTGAGATAGGATGAGACTTCCTTTACGATTTCTTCGTAGCGGGATTTTGAGTATTTTGGGGTTGTGGCATCCATCTTGTTACAGCAACAGATCATTTGCTTCACTCCAAGAGTGAATGCGAGTAAAGCATGCTCACGAGTCTGTCCATCCTTGGAAATACCAGCCTCAAAGCCT…
>As18SrRNA1	TAACAAGGTTTCCGTAGGTGAACCTGCGGAAGGATCATTGTCGAGTTCCTTTTCGAACAGTTGTGAAATTGTGCTCATACCCGACGAGTACTACGTGTTTGTGCTATTAGTGCATGCGTTGTCTTGGCGGGTTCCCTTTTGCTGCCTTCGTGTTGCTTTATTTGAAGTGAAACGAAGAGCAGAAATAAGACACCGGCACAGTTTGTGCCAAGGACAGTTATTGTTGGAGTGCATTGCCATCGTTTTGATGTGCTTTGTGCTATTCTAGCGAGCATCTGAATGACTCCTGGCAATGGATATCTTGGCTCTCGTGTCGATGAAGAACGTAGCGAAATGCGACACTTGGTGTGAATTGCAGAATCCCGTGAACCATCGAGTCTTTGAATGCAAGTTGCGCAC…
>At18SrRNA2	TAACAAGGTTTCCGTAGGTGAACCTGCGGAAGGATCATTGTAGAGTCCCACTTTGAAAGATTGAGAACTTGTACCTATACCCATCGAGAACAAGGCAGTAATGCTATAAATACTGTATTGTTTAGAAGGGTTTCCCTTTGCTACCTTCTTCTTGCTTCACTTGAAGCAAGAAGGAGAGTAGAAATAAGATATCGGCACGGCTTGTGCCAAGGACAGCTGTTGTTGGAGTGCACTGTCGTCTTTATTGATGTGCAGTGTGCATTTTTACAAGCGTGAGCGTCTGAATGACTCCTGGCAATGGATATCTTGGCTCTCGTGTCGATGAAGAACGTAGCGAAATGCGACACTTGGTGTGAATTGCAGAATCCCGTGAATCATCGAGTCTTTGAATGCAAGTTG…
>Ah18SrRNA2	TAACAAGGTTTCCGTAGGTGAACCTGCGGAAGGATCATTGTCGAGTCCCTCTTCAAGAGATTGAGAACATGTAGCATTTAACCATCGAGTCAAGCTAGTTTTGCGATTGCACTTCTGCTTTCTAGATGGATGTCCTTTTGTCGCCTTCAGCTTGCTTTATTCAAGGTAAGAAGGAGAGCGGGAATAAGACCCCGGCGTGGTTCGCGCCAAGGACTGTTGTTGTTGGAGTGCACTGCCTTCTTTTTGTTGTGCGGTGTATTCTCCTACTAGTGTGAGAATATGCATGACTCTTGGCAACGGATATCTAGGCTCTCGCGTCGATGAAGAACGTAGCGAAATGCGATACTTGGTGTGAATTGCAGAATCCCGTGAACCATCGAGTCTTTGAACGCAAGTTGC…
1Sequences of Allium sativum were tracked from genebank with ID of KP116304(AsActin), KP116305 (AsEF-1α), KP116307(As18SrRNA).
2Unigene sequences obtained in the RNA-seq of this sutdy.

## Sheet: Table S4
	Table S4. SNP calls by mapping RNA-seq reads back to assembled transcript
SNP	*	*	*	*	*	A	*	*	*	*	*	*	*	*	T	*	*	*	*	*	*	*	*	*	*	*	*	*	*	*	*	*	*	*	*	*	*	*	*	*	*	*	*	*	*	*	*	*	*
AhFMO1	A	T	G	A	T	G	T	C	C	A	C	T	T	C	C	T	C	A	T	C	T	T	A	T	C	C	A	T	C	C	A	T	C	C	C	C	A	A	A	A	T	G	C	C	C	A	T	T	A
PCR	A	T	G	A	T	A	T	C	C	A	C	T	T	C	T	T	C	A	T	C	T	T	A	T	C	C	A	T	C	C	A	T	C	C	C	C	A	A	A	A	T	G	C	C	C	A	T	T	A
SNP	*	*	*	*	*	*	*	*	*	*	*	*	*	*	*	*	*	*	*	*	*	*	*	*	*	*	*	*	*	*	*	*	*	*	*	*	*	*	*	*	*	*	*	*	*	*	*	*	*
AhALN	A	T	G	G	A	A	A	C	A	T	A	C	A	A	A	C	C	A	G	G	C	A	A	C	A	A	A	A	T	G	C	C	T	T	A	C	C	T	G	A	T	A	A	T	A	T	T	A	C
PCR	A	T	G	G	A	A	A	C	A	T	A	C	A	A	A	C	C	A	G	G	C	A	A	C	A	A	A	A	T	G	C	C	T	T	A	C	C	T	G	A	T	A	A	T	A	T	T	A	C
SNP	*	*	*	*	*	*	*	*	*	*	*	*	*	*	*	*	*	*	*	*	*	*	*	*	*	*	*	*	*	*	*	*	*	*	*	*	*	*	*	*	*	*	*	*	*	*	*	A	*
AhGGT1	A	A	T	T	G	G	T	G	C	C	C	C	T	C	A	T	C	A	G	C	C	G	C	G	G	G	A	C	T	C	T	A	T	T	T	C	T	C	A	T	C	A	A	T	C	C	A	G	C
PCR	A	A	T	T	G	G	T	G	C	C	C	C	T	C	A	T	C	A	G	C	C	G	C	G	G	G	A	C	T	C	T	A	T	T	T	C	T	C	A	T	C	A	A	T	C	C	A	G	C
SNP	*	*	*	*	*	*	*	*	*	*	*	*	*	*	*	*	*	*	*	*	*	*	*	*	*	*	*	*	*	*	*	*	*	*	*	*	*	*	*	*	*	*	*	*	*	*	*	*	*
AhGGT2	A	T	G	G	A	A	C	C	G	G	C	G	C	A	T	G	A	T	G	A	C	C	T	G	G	A	A	T	C	T	T	C	A	C	T	T	C	T	G	C	G	C	T	A	T	C	G	T	G
PCR	A	T	G	G	A	A	C	C	G	G	C	G	C	A	T	G	A	T	G	A	C	C	T	G	G	A	A	T	C	T	T	C	A	C	T	T	C	T	G	C	G	C	T	A	T	C	G	T	G
SNP	*	*	*	*	*	*	*	*	*	*	*	*	*	*	*	*	*	*	*	*	*	*	*	*	*	*	*	*	*	*	*	*	*	*	*	*	*	*	*	*	*	*	*	*	*	*	*	*	*
AhGGT3	A	T	G	A	A	G	G	C	C	T	G	T	G	C	T	G	C	C	T	T	C	A	C	T	C	C	C	T	T	C	C	G	T	C	A	A	G	A	T	T	C	A	C	T	A	C	T	G	C
PCR	A	T	G	A	A	G	G	C	C	T	G	T	G	C	T	G	C	C	T	T	C	A	C	T	C	C	C	T	T	C	C	G	T	C	A	A	G	A	T	T	C	A	C	T	A	C	T	G	C
SNP	*	*	*	*	*	*	*	*	*	*	*	*	*	*	*	*	*	*	*	*	*	*	*	*	*	*	*	*	*	*	*	*	*	*	*	*	*	*	*	*	*	*	*	*	*	*	*	*	*
AhPCS1	A	T	G	G	C	G	C	T	T	G	C	G	G	G	A	C	T	T	T	A	T	C	G	T	C	G	A	G	T	T	C	T	C	C	C	A	T	C	A	C	C	G	C	C	G	G	C	G	A
PCR	A	T	G	G	C	G	C	T	T	G	C	G	G	G	A	C	T	T	T	A	T	C	G	T	C	G	A	G	T	T	C	T	C	C	C	A	T	C	A	C	C	G	C	C	G	G	C	G	A
SNP	*	*	*	*	*	*	*	*	*	*	*	*	*	*	*	*	*	*	*	*	*	*	*	*	*	*	*	*	*	*	*	*	*	*	*	*	*	*	*	*	*	*	*	*	*	*	*	*	*
AtALN	A	T	G	G	A	A	A	C	A	T	A	C	A	A	A	C	C	A	G	G	C	A	A	C	A	A	A	A	T	G	C	C	T	T	A	C	C	T	G	A	T	A	A	T	A	T	T	A	C
PCR	A	T	G	G	A	A	A	C	A	T	A	C	A	A	A	C	C	A	G	G	C	A	A	C	A	A	A	A	T	G	C	C	T	T	A	C	C	T	G	A	T	A	A	T	A	T	T	A	C
SNP	*	*	*	A	*	*	*	*	*	*	*	*	*	*	*	*	*	*	*	*	*	*	*	*	*	*	*	*	*	*	*	*	*	*	*	*	*	*	*	*	*	*	*	*	*	*	*	*	*
AtFMO1	A	T	G	T	T	T	T	C	C	T	C	G	T	C	C	T	T	T	T	T	G	T	C	C	A	T	C	C	A	C	A	A	A	A	T	G	C	C	C	A	C	T	A	C	C	C	T	T	G
PCR	A	T	G	T	T	T	T	C	C	T	C	G	T	C	C	T	T	T	T	T	G	T	C	C	A	T	C	C	A	C	A	A	A	A	T	G	C	C	C	A	C	T	A	C	C	C	T	T	G
SNP	*	*	*	*	*	*	*	*	*	*	*	*	*	*	*	*	*	*	*	*	*	*	*	*	*	*	*	A	*	*	*	*	*	*	*	A	*	*	*	*	*	*	*	T	*	*	A	*	*
AtGGT1	A	T	G	G	C	G	T	C	C	A	C	T	C	A	T	G	A	T	C	A	A	C	G	C	C	T	G	G	A	A	T	C	A	T	C	G	C	T	C	C	T	G	C	C	C	C	G	T	G
PCR	A	T	G	G	C	G	T	C	C	A	C	T	C	A	T	G	A	T	C	A	A	C	G	C	C	T	G	G	A	A	T	C	A	T	C	G	C	T	C	C	T	G	C	C	C	C	G	T	G
SNP	*	*	*	*	*	*	*	*	*	*	*	*	*	*	*	*	*	*	*	*	*	*	*	*	*	*	*	*	*	*	*	*	*	*	*	*	T	*	*	*	*	*	*	*	*	*	*	*	*
AtGGT2	A	T	G	G	A	A	C	C	G	G	C	G	C	A	T	G	A	T	G	A	C	C	T	G	A	A	A	T	C	T	T	C	G	C	T	T	C	T	G	C	G	C	T	A	T	C	G	T	G
PCR	A	T	G	G	A	A	C	C	G	G	C	G	C	A	T	G	A	T	G	A	C	C	T	G	A	A	A	T	C	T	T	C	G	C	T	T	C	T	G	C	G	C	T	A	T	C	G	T	G
SNP	*	*	*	*	*	*	*	*	*	*	*	*	*	*	*	C	*	*	*	*	*	*	*	*	*	*	*	*	*	*	*	*	*	*	*	*	*	*	*	*	*	*	*	*	*	*	*	*	*
AtGGT3	A	T	G	C	C	T	G	C	T	T	A	T	A	T	G	G	C	C	A	A	A	T	G	G	C	T	A	G	C	A	G	T	A	A	C	A	T	T	G	C	T	C	C	T	A	C	T	A	G
PCR	A	T	G	C	C	T	G	C	T	T	A	T	A	T	G	G	C	C	A	A	A	T	G	G	C	T	A	G	C	A	G	T	A	A	C	A	T	T	G	C	T	C	C	T	A	C	T	A	G
SNP	*	*	*	*	*	*	*	*	*	*	*	C	*	*	*	*	*	*	*	*	*	*	*	*	*	*	*	*	*	*	*	*	*	*	*	*	*	*	*	*	*	*	*	*	G	*	*	*	*
AtPCS1	A	T	G	G	C	G	C	T	G	G	C	G	G	G	A	C	T	T	T	T	T	C	G	T	C	G	A	G	T	T	C	T	C	C	C	T	T	C	A	C	C	G	C	C	A	G	C	C	A
PCR	A	T	G	G	C	G	C	T	G	G	C	G	G	G	A	C	T	T	T	T	T	C	G	T	C	G	A	G	T	T	C	T	C	C	C	T	T	C	A	C	C	G	C	C	G	G	C	C	A
	0				Ratio of SNP detected in the reads																1
	0	0.05	0.1	0.15	0.2	0.25	0.3	0.35	0.4	0.45	0.5	0.55	0.6	0.65	0.7	0.75	0.8	0.85	0.9	0.95	1
[truncated: 1,841 more columns]

## Sheet: Table S5
Table S5. Primer sequences used in this study
Primer name	Sequence	Note
FMO1-qF	5'-CCTGGAATTGATGTATGGCCT-3'	Real time-PCR/semi-quantitative RT-PCR
FMO1-qR	5'-CAGTGCAATGCATGATGACATC-3'	Real time-PCR/semi-quantitative RT-PCR
GGT3-qF	5'-GAGGGGGTATAGAGTGAAGGTAAG-3'	Real time-PCR/semi-quantitative RT-PCR
GGT3-qR	5'-GAAGCCCAAGTGAACCAGAAA-3'	Real time-PCR/semi-quantitative RT-PCR
GGT2-qF	5'-TTGGTGCTGGAGTGATGTCG-3'	Real time-PCR/semi-quantitative RT-PCR
GGT2-qR	5'-AAGAGGTGACATAGAAGACAAGGG-3'	Real time-PCR/semi-quantitative RT-PCR
GGT1-qF	5'-AATGGCAGCGTAGGTCAGAAA-3'	Real time-PCR/semi-quantitative RT-PCR
GGT1-qR	5'-CCAACTATGGTGTACCCCAAAAC-3'	Real time-PCR/semi-quantitative RT-PCR
PCS1-qF	5'-ACTTCCAGACACAATCTGAACCTG-3'	Real time-PCR/semi-quantitative RT-PCR
PCS1-qR	5'-GCTTACGGAAATCCTCAAGAGTG-3'	Real time-PCR/semi-quantitative RT-PCR
ALN1-qF	5'-GCAGTGCTAGTTTCAGGATGGC-3'	Real time-PCR/semi-quantitative RT-PCR
ALN1-qR	5'-CATTTCCTTTCCACTCGTACCCT-3'	Real time-PCR/semi-quantitative RT-PCR
Actin-qF	5'-GCACCAAGAGCAGTATTCCCAAGCA-3'	Real time-PCR/semi-quantitative RT-PCR
Actin-qR	5'-GCACAGGATGTTCTTCAGGAGCAA-3'	Real time-PCR/semi-quantitative RT-PCR
18Sr-qF	5'-CGATGAAGAACGTAGCGAAATG-3'	Real time-PCR/semi-quantitative RT-PCR
18Sr-qR	5'-CGTGACGCCCAAGCAGAC-3'	Real time-PCR/semi-quantitative RT-PCR
AsEF-1α-qF	5'-ATACCTCTTTCACGCTCAGCCTT-3'	Real time-PCR/semi-quantitative RT-PCR
AsEF-1α-qR	5'-TAGGTGGCATTGACAAGCGT-3'	Real time-PCR/semi-quantitative RT-PCR
PCS1-F	5'-ACTTTATCGTCGAGTTCTCCC-3'	Isolation of cDNA fragment in gene 'PCS1'
PCS1-R	5'-TGTAGAACCTCCTCCTGAAGT-3'	Isolation of cDNA fragment in gene 'PCS1'
GGT3-F	5'-CCAAATGGCTAGCAGTAACA-3'	Isolation of cDNA fragment in gene 'GGT3'
GGT3-R	5'-CAGAAATATATGAGTGGCTGC-3'	Isolation of cDNA fragment in gene 'GGT3'
GGT2-F	5'-GGAACCGGCGCATGATGAC-3'	Isolation of cDNA fragment in gene 'GGT2'
GGT2-R	5'-CTAACAGCGGTCAGCATTCCTC-3'	Isolation of cDNA fragment in gene 'GGT2'
GGT1-F	5'-CCGTAGTGGCGACAGCAATAT-3'	Isolation of cDNA fragment in gene 'GGT1'
GGT1-R	5'-CTTTTGCAGCCTCGGAGAAC-3'	Isolation of cDNA fragment in gene 'GGT1'
FMO1-F	5'-GATGGGGTTTCTCGATTTTC-3'	Isolation of cDNA fragment in gene 'FMO1'
FMO1-R	5'-CTTGTGCAACCAAATGATC-3'	Isolation of cDNA fragment in gene 'FMO1'
AhPCS1-F	5'-TATTCACTTTCGCGGGTCGCA-3'	Isolation of cDNA fragment in gene 'PCS1'
AhPCS1-R	5'-TAGCTTGGTACAAAGCCAGT-3'	Isolation of cDNA fragment in gene 'PCS1'
AtPCS1-F	5'- CAATGGTCAAAATTCTTCCGA-3'	Isolation of cDNA fragment in gene 'PCS1'
AtPCS1-R	5'- ACGATTCAACATTGAGAATAC-3'	Isolation of cDNA fragment in gene 'PCS1'
AhGGT1-F	5'-ACTGCTGCTAATCGTCGAGG-3'	Isolation of cDNA fragment in gene 'GGT1'
AhGGT1-R	5'-TGTACTAAAGCACGTGAGTA-3'	Isolation of cDNA fragment in gene 'GGT1'
AtGGT1-F	5'-GAGATCCTAACCACCACTCG-3'	Isolation of cDNA fragment in gene 'GGT1'
AtGGT1-R	5'-TCTCCTTTATCGATATTCATT -3'	Isolation of cDNA fragment in gene 'GGT1'
AhGGT2-F	5'-GATGCTGCATGTTCATTGTC-3'	Isolation of cDNA fragment in gene 'GGT2'
AhGGT2-R	5'-TCCATTGCCCTTCAAGTACC-3'	Isolation of cDNA fragment in gene 'GGT2'
AtGGT2-F	5'-CCTGATTGCTTCCACAACTG-3'	Isolation of cDNA fragment in gene 'GGT2'
AtGGT2-R	5'-TGTTCAATCCTTCAGAATTC-3'	Isolation of cDNA fragment in gene 'GGT2'
AhGGT3-F	5'-GAATCATAATCCTTCATTTTC-3'	Isolation of cDNA fragment in gene 'GGT3'
AhGGT3-R	5'-CTCAATAAATACACATTATTC-3'	Isolation of cDNA fragment in gene 'GGT3'
AtGGT3-F	5'-TCTTGGGAAGAAGAAAGTACA-3'	Isolation of cDNA fragment in gene 'GGT3'
AtGGT3-R	5'-AGCTATTGTAAGTGTTGTAAC-3'	Isolation of cDNA fragment in gene 'GGT3'
AhFMO1-F	5'-GGTATCCGCATGGCGCATTG-3'	Isolation of cDNA fragment in gene 'FMO1'
AhFMO1-R	5'-CTGCATGAATACATAATCTG-3'	Isolation of cDNA fragment in gene 'FMO1'
AtFMO1-F	5'-TCGGACACGGCTACAACTCT-3'	Isolation of cDNA fragment in gene 'FMO1'
AtFMO1-R	5'-TACAATTGTGATGTGTATGC-3'	Isolation of cDNA fragment in gene 'FMO1'
ALN-F	5'-AAGGCAGCAGAAGAGGCAGA-3'	Isolation of cDNA fragment in gene 'allinase'
ALN-R	5'-TTTGTCTTGATCAAACTCA-3'	Isolation of cDNA fragment in gene 'allinase'
ALN-R	5'-CAGTCCGTGGATCAGTTGAGTA-3'	Isolation of cDNA fragment in gene 'allinase'
